1 **The sex-specific VC neurons are mechanically activated motor neurons that facilitate**  
2 **serotonin-induced egg laying in *C. elegans***

3 Richard J. Kopchock III<sup>1</sup>, Bhavya Ravi<sup>1,2</sup>, Addys Bode<sup>1</sup>, & Kevin M. Collins<sup>1,2,3</sup>

4 <sup>1</sup>Department of Biology, University of Miami, Coral Gables, FL 33143 USA

5 <sup>2</sup>Neuroscience Program, University of Miami School of Medicine, Miami, FL 33136 USA

6 <sup>3</sup>To whom correspondence should be addressed:

7 [kevin.collins@miami.edu](mailto:kevin.collins@miami.edu)

8 Department of Biology

9 University of Miami

10 1301 Memorial Drive

11 Coral Gables, FL 33143

12 Tel: (305) 284-9058

13

14 Short title: VC neurons facilitate serotonin-induced egg laying

15 54 pages with 8 Figures, 1 Table, and 5 Movies

16 Abstract- 221 words, Introduction- 632 words, Discussion- 1373 words

17 **Acknowledgements**

18 This work was funded by grants from the NIH (R01-NS086932) and NSF (IOS-1844657) to KMC.  
19 RJK 3<sup>rd</sup> was supported by a University of Miami Maytag Fellowship. We thank David M. Miller III  
20 for sharing plasmids. Some of the strains used in this study were provided by the C.  
21 *elegans* Genetics Center, which is funded by NIH Office of Research Infrastructure Programs  
22 (P40 OD010440). We thank Drs. Julia Dallman, Grace Zhai, Mason Klein, and members of the  
23 Collins lab for helpful discussions and feedback on the manuscript.

24

25 The authors declare no competing financial interests.

26 **Significance Statement**

27 Many animal motor behaviors are modulated by the neurotransmitters serotonin and  
28 acetylcholine. Such motor circuits also respond to mechanosensory feedback, but how  
29 neurotransmitters and mechanoreceptors work together to coordinate behavior is not well  
30 understood. We address these questions using the egg-laying circuit in *C. elegans* where we  
31 can manipulate presynaptic neuron and postsynaptic muscle activity in behaving animals while  
32 recording circuit responses through Ca<sup>2+</sup> imaging. We find that the cholinergic VC motoneurons  
33 are important for proper vulval muscle contractility and egg laying in response to serotonin.  
34 Muscle contraction also activates the VCs, forming a positive feedback loop that promotes full  
35 contraction for egg release. In all, mechanosensory feedback provides a parallel form of  
36 modulation that shapes circuit responses to neurotransmitters.

37

38 **Abstract**

39 Successful execution of behavior requires coordinated activity and communication between  
40 multiple cell types. Studies using the relatively simple neural circuits of invertebrates have helped  
41 to uncover how conserved molecular and cellular signaling events shape animal behavior. To  
42 understand the mechanisms underlying neural circuit activity and behavior, we have been  
43 studying a simple circuit that drives egg-laying behavior in the nematode worm *C. elegans*. Here  
44 we show that the sex-specific, Ventral C (VC) motor neurons are important for vulval muscle  
45 contractility and egg laying in response to serotonin.  $Ca^{2+}$  imaging experiments show the VCs  
46 are active during times of vulval muscle contraction and vulval opening, and optogenetic  
47 stimulation of the VCs promotes vulval muscle  $Ca^{2+}$  activity. Blocking VC neurotransmission  
48 inhibits egg laying in response to serotonin and increases the failure rate of egg-laying attempts,  
49 indicating that VC signaling facilitates full vulval muscle contraction and opening of the vulva for  
50 efficient egg laying. We also find the VCs are mechanically activated in response to vulval  
51 opening. Optogenetic stimulation of the vulval muscles is sufficient to drive VC  $Ca^{2+}$  activity and  
52 requires muscle contractility, showing the presynaptic VCs and the postsynaptic vulval muscles  
53 can mutually excite each other. Together, our results demonstrate that the VC neurons facilitate  
54 efficient execution of egg-laying behavior by coordinating postsynaptic muscle contractility in  
55 response to serotonin and mechanosensory feedback.

56

## 57 **Introduction**

58 A fundamental goal of neuroscience is to understand the neural basis of behavior  
59 (Bargmann & Marder, 2013). Recent work reporting the synaptic wiring diagrams, or  
60 connectomes, of nervous systems provides an unprecedented opportunity to study how the  
61 nervous system directs animal behavior (Cook et al., 2019; Lerner et al., 2016; Meinertzhagen,  
62 2018). However, connectomes alone are not sufficient to predict nervous system function  
63 (Batista-García-Ramó & Fernández-Verdecia, 2018; Swanson & Lichtman, 2016; Taylor et al.,  
64 2019). Released neurotransmitters can signal both synaptically and extrasynaptically through  
65 distinct receptors to drive short-term and long-term behavior changes (Chase et al., 2004; Del-  
66 Bel & De-Miguel, 2018; Donnelly et al., 2013; Hardingham & Bading, 2010; Koelle, 2018).  
67 Neuropeptides can be co-released from synapses and signal alongside neurotransmitters  
68 (Brewer et al., 2019; Nusbaum et al., 2017). Understanding how an assembly of ionotropic and  
69 metabotropic signaling events drives the complex pattern of circuit activity is facilitated by direct  
70 tests in invertebrate animals (Bargmann & Marder, 2013) such as those amenable to genetic  
71 investigation (Sengupta & Samuel, 2009). Such studies have the potential to reveal conserved  
72 neural circuit signaling mechanisms that underlie behavior.

73 The egg-laying circuit of the nematode worm *C. elegans* provides an ideal model for such  
74 a reductionist approach (Figure 1A-B). The canonical egg-laying circuit is comprised of three  
75 main cell types: the serotonergic HSN command motor neurons, the vulval muscles, and the  
76 cholinergic VC motor neurons (Schafer, 2006). An active egg-laying behavior state is initiated  
77 when the HSN neurons release serotonin (Desai et al., 1988; Waggoner et al., 1998), which  
78 signals through G protein coupled serotonin receptors (Fernandez et al., 2020; Hapiak et al.,  
79 2009), and NLP-3 neuropeptides (Brewer et al., 2019). Individual eggs are laid when the vm1  
80 and vm2 vulval muscle cells contract in synchrony to open the vulva (Collins & Koelle, 2013; Li  
81 et al., 2013). The VC motor neurons are the primary cholinergic neurons of the egg-laying circuit

82 (Duerr et al., 2001; Pereira et al., 2015), and are active during egg-laying behavior (Collins et  
83 al., 2016; Zhang et al., 2008), but the function of their signaling is not well understood (Schafer,  
84 2006). As in mammals, most muscle contraction events in *C. elegans* are ultimately driven by  
85 acetylcholine (ACh; Richmond & Jorgensen, 1999; Trojanowski et al., 2016). Nicotinic ACh  
86 receptor (nAChR) agonists promote egg laying by acting on the vulval muscles (Kim et al., 2001;  
87 Waggoner et al., 2000), consistent with the VCs and/or other motor neurons releasing ACh to  
88 excite the vulval muscles (Waggoner et al., 1998). However, ACh synthesis and packaging  
89 mutants are hyperactive for egg laying, indicating ACh can also inhibit egg laying, possibly by  
90 signaling through inhibitory muscarinic ACh receptors (Bany et al., 2003; Fernandez et al.,  
91 2020). This hyperactive egg-laying phenotype resembles animals in which VC neuron  
92 development has been disrupted by laser ablation or mutation (Bany et al., 2003), suggesting  
93 instead that ACh released from the VCs acts, at least in part, to inhibit egg laying, perhaps in  
94 response to sensory input. The VCs extend processes along the vulva, leading to the proposal  
95 they might also relay mechanosensory feedback in response to vulval opening (Zhang et al.,  
96 2010). How the VC neurons become activated and signal to regulate egg-laying behavior  
97 remains unclear. Such insight is necessary for each cell in a neural circuit to transform static  
98 information from wiring diagrams into dynamic and meaningful understanding of animal  
99 behavior.

100 Here we address the function of the VC neurons during egg-laying behavior. We find that  
101 the VCs function within a serotonergic pathway to drive egg release. The VCs provide excitatory  
102 input to convert the initial stages of vulval muscle contraction into a successful egg-laying event.  
103 The VCs achieve this through direct activation in response to vulval muscle excitation and  
104 contraction, forming a positive feedback loop until successful egg laying is achieved.

105

106 **Results**

107           The VCs are a group of six, hermaphrodite-specific, cholinergic motor neurons spaced  
108 out along the ventral cord that make synapses onto the HSNs, vm2 vulval muscles, body wall  
109 muscles, and various motor neurons involved in locomotion (**Figure 1A**; Cook et al., 2019; White  
110 et al., 1986). VC4 and VC5 in particular are the most proximal to the vulva and make extensive  
111 synapses onto the vm2 vulval muscles (Cook et al., 2019; White et al., 1986). Egg-laying events  
112 are always accompanied by a VC Ca<sup>2+</sup> transient, but not all VC Ca<sup>2+</sup> transients coincide with  
113 egg release (Collins et al., 2016). ACh released from VCs has been suggested to act through  
114 nAChRs including UNC-29 on the vulval muscles to drive contraction (Kim et al., 2001; Schafer,  
115 2006), as well as through the muscarinic ACh receptor GAR-2 on the HSNs to inhibit egg laying  
116 (Bany et al., 2003; Fernandez et al., 2020). VC signaling has also been suggested to slow animal  
117 locomotion speed around egg-laying events (Collins et al., 2016), likely through the synapses it  
118 makes onto the body wall muscles and locomotion motor neurons (Cook et al., 2019; White et  
119 al., 1986). In all, VC signaling appears to be complex and function through multiple pathways to  
120 regulate egg-laying circuit activity and behavior.

121           The vulval muscles are comprised of four vm1-type and four vm2-type muscle cells which  
122 are all electrically coupled but receive distinct synaptic input (White et al., 1986). The vm2 vulval  
123 muscles are innervated by the HSN and VC neurons (Cook et al., 2019; White et al., 1986). The  
124 vm1s receive cholinergic input from single VA and VB motor neurons which are part the  
125 locomotion circuit (White et al., 1986; Zhen & Samuel, 2015). Egg laying occurs when all 8 vulval  
126 muscle cells are active and pull the vulva open to expel an egg (Zhang et al., 2008). Serotonergic  
127 input from the HSNs helps to excite the vm2 vulval muscles and coordinate their activity during  
128 egg laying (Brewer et al., 2019; Li et al., 2013; Shyn et al., 2003). The vm1 vulval muscles show  
129 rhythmic activity both during and outside of egg laying, suggesting that they are either intrinsically  
130 active or excited by VA and VB synaptic inputs (Collins et al., 2016; Collins & Koelle, 2013; Shyn

131 et al., 2003). Vulval muscle  $\text{Ca}^{2+}$  transients start in the vm1 muscle cells and propagate into the  
132 vm2 muscles during egg laying events (Brewer et al., 2019; Collins & Koelle, 2013), suggesting  
133 vm1 excitation provides a trigger for full vulval muscle contraction and egg laying.

134 The pair of hermaphrodite-specific HSN neurons make synapses onto both the VCs and  
135 the vm2 vulval muscles (Cook et al., 2019; White et al., 1986). Serotonin and NLP-3  
136 neuropeptides released by the HSNs have been shown to be critical for normal egg-laying  
137 behavior to occur (Brewer et al., 2019; Waggoner et al., 1998). Consistent with the role of HSNs  
138 initiating egg-laying behavior, exogenous serotonin potently increases the  $\text{Ca}^{2+}$  activity of the  
139 vulval muscles and VC neurons (Shyn et al., 2003; Zhang et al., 2008). Additionally, laser  
140 ablation experiments have indicated that loss of the VC neurons disrupts the induction of egg  
141 laying in response to serotonin (Shyn et al., 2003; Waggoner et al., 1998). Thus, the role of the  
142 VC neurons in the egg-laying circuit and behavior may be closely associated with serotonergic  
143 signaling from the HSNs.

#### 144 **The VC neurons promote egg laying in response to serotonin**

145 To test directly how loss of synaptic transmission from the VC motor neurons affects egg-  
146 laying circuit activity and behavior (Figure 1B), we used a modified *lin-11* promoter/enhancer  
147 (Bany et al., 2003) to drive transgenic expression of Tetanus Toxin (TeTx; Jose et al., 2007)  
148 which blocks both neurotransmitter and neuropeptide release (Whim et al., 1997) from the six  
149 VC neurons. Expression of TeTx in the VC neurons did not cause any gross defects in steady-  
150 state egg accumulation compared to non-transgenic control animals, indicating that the VC  
151 neurons are not strictly required for egg laying (compare Figures 1C and 1D, quantified in Figure  
152 1G). In contrast, *egl-1(n986dm)* mutant animals in which the HSNs undergo apoptosis (Trent et  
153 al., 1983), showed a dramatic impairment of egg laying, accumulating significantly more  
154 embryos (Figures 1E and 1G). Previous studies indicated that laser ablation of both the HSNs



155 and VCs caused additive defects in egg laying (Waggoner et al., 1998). However, transgenic  
156 expression of TeTx in the VCs in HSN-deficient *egl-1(n986dm)* mutant animals did not  
157 significantly enhance their defects in egg laying (Figure 1F and 1G). We have previously shown  
158 that wild-type animals lay their first egg around 7 hours after the L4-adult molt, a time when the  
159 VCs show their first activity (Ravi et al., 2018a). Animals with inhibited VC neurotransmission  
160 showed no significant change in the onset of egg laying compared to non-transgenic control  
161 animals (Figure 1H). In contrast, the onset of egg laying in *egl-1(n968dm)* mutant animals lacking  
162 HSNs is significantly delayed, occurring about 18 hours after the L4-adult molt (Figure 1H).  
163 Expression of TeTx in the VCs in HSN-deficient animals did not enhance the delay in egg laying  
164 significantly (Figure 1H). These results together show that transmitter-mediated signaling from  
165 the VCs is not required for egg-laying behavior to occur under normal culturing conditions.

166 We next used a drug-treatment approach to explore possible functions of the VC neurons  
167 that may not be apparent in animals under standard laboratory conditions. Serotonin potently  
168 stimulates egg laying even in conditions where egg laying is normally inhibited, such as in liquid  
169 M9 buffer (Trent et al., 1983). As expected, serotonin promotes egg laying in M9 buffer in wild-  
170 type animals (Figure 1I). We found that transgenic animals expressing TeTx in the VCs failed to  
171 lay eggs in response to exogenous serotonin in M9 buffer across varying serotonin  
172 concentrations (Figure 1I). Going forward, we chose to conduct experiments at a single  
173 serotonin concentration of 18.5 mM. HSN-deficient *egl-1(n986dm)* mutant animals are egg-  
174 laying defective under normal conditions but will still lay eggs in response to exogenous  
175 serotonin (Schafer et al., 1996), and this response was suppressed in animals lacking VC  
176 neurotransmission at 18.5 mM serotonin (Figure 1J). This resistance to exogenous serotonin in  
177 VC neurotransmission-inhibited animals was not unique to M9 buffer, as transgenic animals  
178 placed on serotonin-infused agar also showed a reduced egg-laying response (Figure 1K).

179 These results show that VC neurotransmitter release serves an important role for egg laying in  
180 response to exogenous serotonin.

181 Despite the VCs being important for egg laying in response to exogenous serotonin  
182 (Figure 1I-K), animals with blocked VC neurotransmission are still able to lay eggs at a normal  
183 rate (Figure 1G). One potential explanation for this is that NLP-3 neuropeptide signaling is able  
184 to compensate for the loss of the VC-mediated serotonergic signaling pathway (Brewer et al.,  
185 2019). Based on this model, blocking VC neurotransmission in an *nlp-3* mutant background  
186 might phenocopy animals lacking all neurotransmitter release from the HSNs, as seen in the  
187 *egl-1(n986dm)* mutant. However, we found no significant increase in egg accumulation when  
188 blocking VC neurotransmission in an *nlp-3* mutant background (Figure 1L). This suggests that  
189 under standard *C. elegans* culture conditions, serotonin is able to signal through VC-  
190 independent pathway to retain a normal rate of egg laying, likely by acting on the vulval muscles  
191 directly (Hapiak et al., 2009).

192 It was possible that the observed defects in serotonin response caused by inhibiting VC  
193 neurotransmission could be due to impaired circuit development and/or by compensatory  
194 changes in circuit activity. Expression from the VC-specific promoter used to drive TeTx begins  
195 in the L4 stage as the egg-laying circuit is completing development, well before the onset of egg-  
196 laying behavior (Ravi et al., 2018a). To silence the VCs acutely after circuit development is  
197 complete, we transgenically expressed Histamine-gated chloride channels (HisCl) and treated  
198 the animals with exogenous histamine (Pokala et al., 2014; Ravi et al., 2018a). Histamine  
199 silencing of the VCs caused no gross changes in steady-state egg accumulation (Figure 1M),  
200 confirming the results with TeTx that VC neurotransmission is not required for egg laying.  
201 However, acute histamine silencing of the VCs reduced egg laying in response to serotonin in  
202 both wild-type and HSN-deficient *egl-1(n986dm)* mutant animals (Figure 1N), consistent with the

203 results observed when blocking VC neurotransmission with TeTx. Together, these results show  
204 that both VC neuron activity and synaptic transmission are dispensable for egg laying under  
205 normal growth conditions, but the VCs do facilitate egg laying in response to exogenous  
206 serotonin.

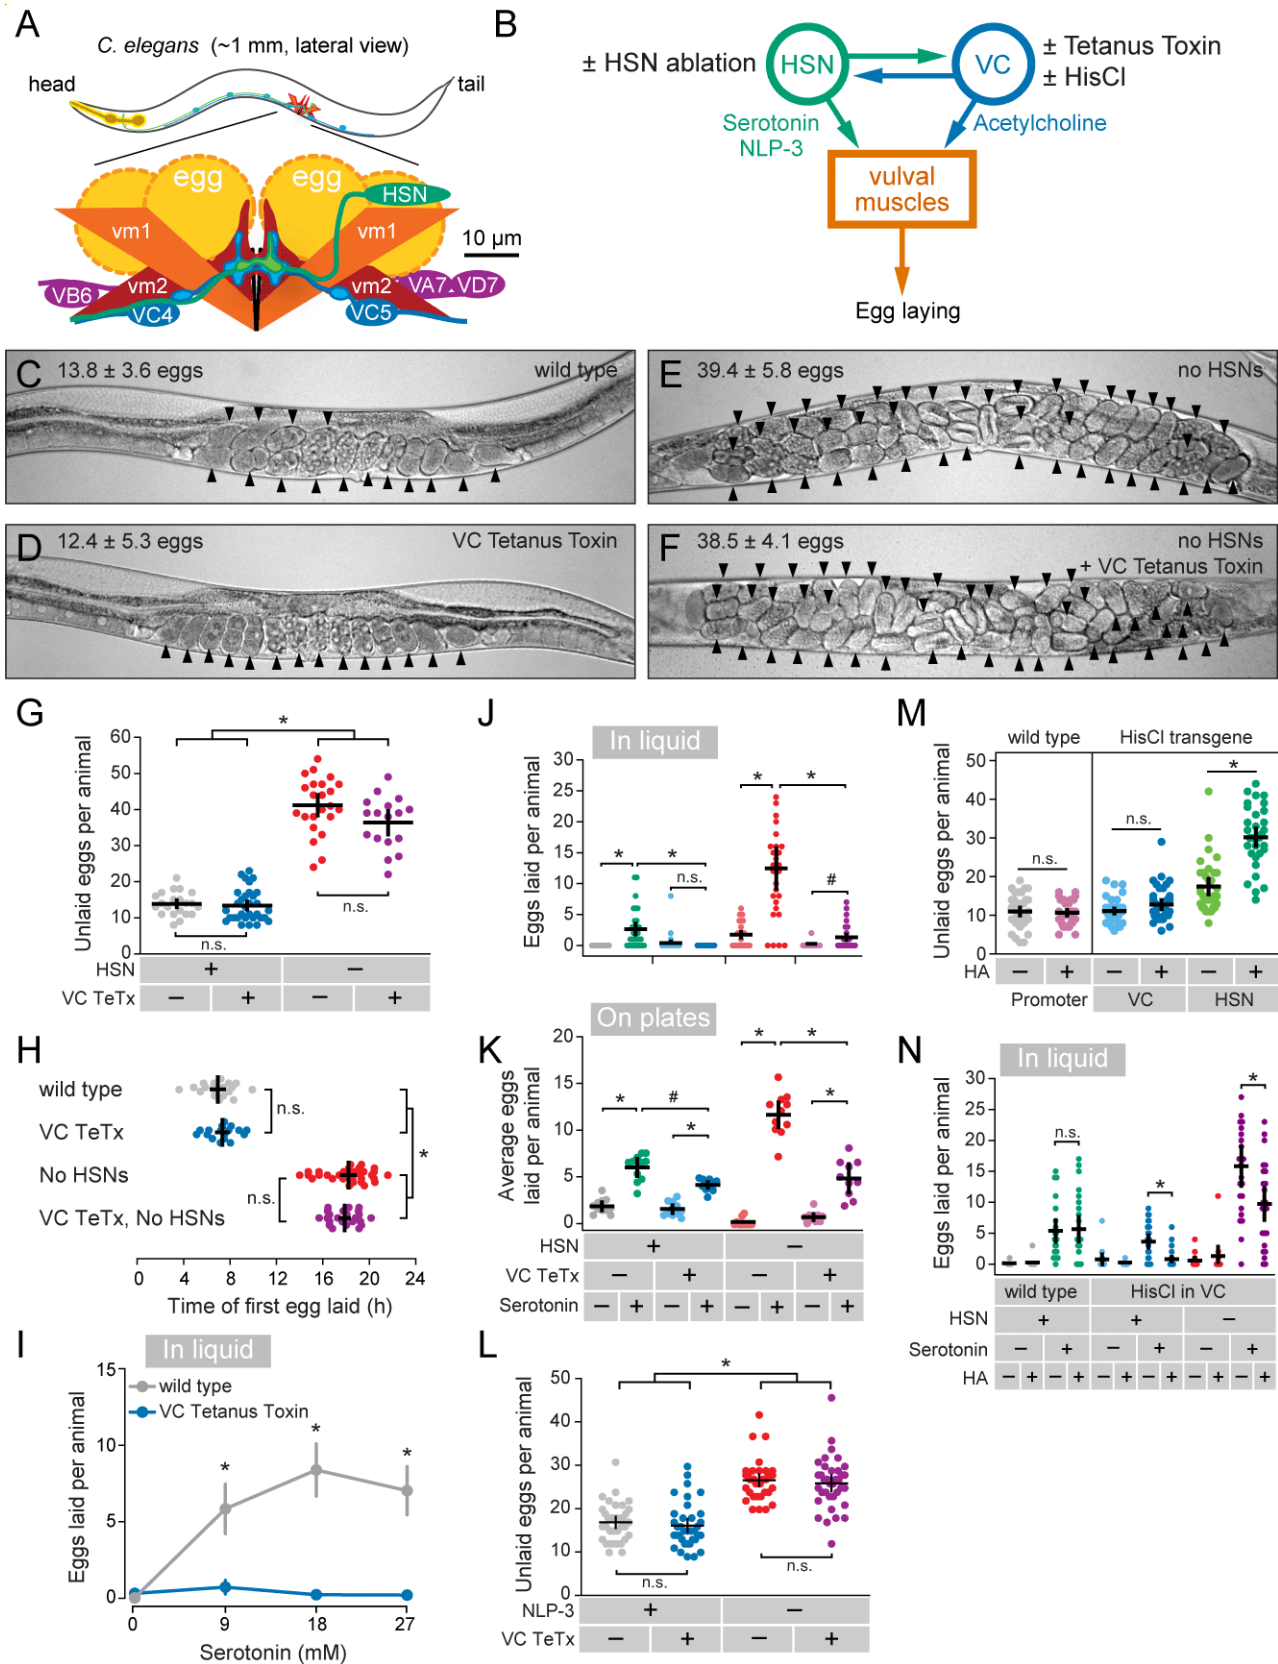

207

208

**Figure 1. VC neurotransmission facilitates egg laying in response to serotonin.**

209 (A) Graphical representation of the *C. elegans* egg-laying circuit (modified from Collins et al.,  
210 2016). (B) Simplified circuit diagram showing the synapses and the primary neurotransmitters  
211 released between the HSN neurons, VC neurons, and vulval muscles. The cell-specific  
212 transgene expressions performed throughout this figure are indicated. (C-F) Representative  
213 images of the *C. elegans* uterus showing unlaidd eggs (arrowheads) in wild-type, transgenic  
214 animals expressing Tetanus Toxin (TeTx) in the VCs, and HSN-ablated *egl-1(986dm)* mutant  
215 animals. (G) Measurement of steady-state egg accumulation in animals from **Figure 1C-F** ( $\pm 95$   
216 confidence intervals for the mean); asterisks indicate  $p < 0.0001$  and n.s. indicates  $p > 0.05$  (one-  
217 way ANOVA with Bonferroni's correction for multiple comparisons;  $n \geq 17$ ). (H) Scatter plot  
218 showing timing of first egg laid after the larval to adult molt in animals with blocked VC  
219 neurotransmission and ablated HSNs (asterisk indicates  $p < 0.0001$ , one-way ANOVA with  
220 Bonferroni's correction for multiple comparisons;  $n \geq 17$ ). (I) Blockage of VC synaptic transmission  
221 inhibits serotonin-induced egg laying. Animals expressing TeTx in the VCs were placed into M9  
222 buffer or M9 containing the indicated concentrations of serotonin and scored for number of eggs  
223 laid; asterisks indicate  $p < 0.0001$  (Kruskal-Wallis test with Dunn's correction for multiple  
224 comparisons;  $n \geq 32$ ). (J) Blockage of VC synaptic transmission inhibits serotonin-induced egg  
225 laying in HSN-ablated animals. HSN-ablated *egl-1(986dm)* mutant animals expressing TeTx in  
226 the VCs were placed in M9 buffer or M9 containing 18.5 mM serotonin; asterisks indicate  
227  $p \leq 0.0002$ , pound indicates  $p = 0.0225$  and n.s. indicates  $p > 0.05$  (Kruskal-Wallis test with Dunn's  
228 correction for multiple comparisons;  $n \geq 22$ ). (K) Animals with inhibited VC neurotransmission lay  
229 fewer eggs compared to wild-type animals in response to 18.5 mM serotonin under otherwise  
230 normal culturing conditions on solid media agar plates; asterisks indicate  $p < 0.0001$ , pound  
231 indicates  $p = 0.0026$ , and n.s. indicates  $p > 0.05$  (one-way ANOVA with Bonferroni's correction for  
232 multiple comparisons;  $n \geq 10$ ). (L) Measurement of steady-state egg accumulation in animals  
233 expressing TeTx in the VCs in an *nlp-3(tm3023)* mutant background ( $\pm 95$  confidence intervals  
234 for the mean); asterisks indicate  $p < 0.0001$  and n.s. indicates  $p > 0.05$  (one-way ANOVA with  
235 Bonferroni's correction for multiple comparisons;  $n \geq 35$ ). (M) Measurement of steady-state egg  
236 accumulation in animals expressing Histamine-gated chloride channels (HisCl) in either the VC  
237 or HSN neurons grown with or without histamine; asterisk indicates  $p < 0.0001$  and n.s. indicates  
238  $p > 0.05$  (one-way ANOVA with Bonferroni's correction for multiple comparisons;  $n \geq 33$ ). (N) Acute  
239 electrical silencing of the VCs blocks serotonin-induced egg laying. Animals expressing HisCl in  
240 the VCs in either a wild-type or HSN-ablated *egl-1(986dm)* mutant background were incubated  
241 with 0 or 4 mM histamine for four hours, placed into wells with M9 buffer with 0 or 18.5 mM  
242 serotonin, and the number of eggs laid after 1 hour were counted; asterisks indicates  $p < 0.05$   
243 and n.s. indicates  $p > 0.05$  (Kruskal-Wallis test with Dunn's correction for multiple comparisons;  
244  $n \geq 12$  for control M9 and  $n \geq 24$  for serotonin).

245

## 246 **VC Ca<sup>2+</sup> activity is coincident with vulval muscle activity and egg laying**

247 The VC neurons show rhythmic Ca<sup>2+</sup> activity during the egg-laying active state (Collins et  
248 al., 2016). However, only ~1/3 of VC Ca<sup>2+</sup> transients were temporally coincident with vulval

249 muscle contractions that resulted in egg release (Collins et al., 2016), raising questions about  
250 the function of the VC Ca<sup>2+</sup> transients that do not coincide with egg laying. To understand the  
251 function of VC Ca<sup>2+</sup> activity, we expressed GCaMP5 in the VC neurons to measure Ca<sup>2+</sup>  
252 dynamics in the VC cell bodies and processes most proximal to the vulva (VC4 & VC5; [Figure](#)  
253 [2A and Figure 2B](#)) while simultaneously observing vulval opening and egg-laying behavior in a  
254 separate brightfield channel, as described (Ravi et al., 2018b). Since *C. elegans* neurons  
255 generally exhibit graded potentials, measurements of VC Ca<sup>2+</sup> near synapses can be expected  
256 to correspond closely with the degree of neurotransmitter and neuropeptide release (P. Liu et  
257 al., 2013; Q. Liu et al., 2009). As expected, we found that egg-laying events were always  
258 accompanied by a VC Ca<sup>2+</sup> transient, but not every VC Ca<sup>2+</sup> transient resulted in an egg-laying  
259 event ([Figure 2C; Movie 1](#)). These remaining VC Ca<sup>2+</sup> transients were almost always observed  
260 with weak muscle contraction and partial opening of the vulva, termed a vulval muscle “twitch,”  
261 which are primarily mediated by the vm1 vulval muscles ([Figure 2C and 2F](#); Collins & Koelle,  
262 2013). As quantified in [Figure 2F](#), we found that 48% of VC Ca<sup>2+</sup> transients were associated with  
263 vulval muscle twitch contractions, and 39% of VC Ca<sup>2+</sup> transients were associated with strong  
264 vulval muscle contractions that support egg release, which are the result of simultaneous vm1  
265 and vm2 vulval muscle contraction (Collins & Koelle, 2013). To determine if presynaptic HSN  
266 activity was sufficient to drive VC and vulval muscle activity downstream, we optogenetically  
267 stimulated HSNs transgenically expressing Channelrhodopsin-2 and simultaneously recorded  
268 VC Ca<sup>2+</sup> activity and vulval muscle contractility ([Figure 2A](#)). As previously reported, optogenetic  
269 HSN stimulation was sufficient to induce an active egg-laying behavior state (Collins et al., 2016).  
270 We found that optogenetic stimulation of HSNs drove a robust increase in VC Ca<sup>2+</sup> transients  
271 that were associated with egg-laying events, but we still observed VC Ca<sup>2+</sup> transients during the  
272 weaker vulval muscle twitching contractions ([Figure 2D](#)). HSN optogenetic stimulation rapidly  
273 elevated average Ca<sup>2+</sup> levels in the VCs, within 5 seconds after blue light exposure ([Figure 2E](#)).

274 The light-dependent increase in VC  $\text{Ca}^{2+}$  activity and vulval muscle contractions were not  
275 observed in animals grown without the essential cofactor, all-trans-retinal (ATR; [Figure 2D and](#)  
276 [2E](#)). During optogenetic HSN activation, 60% of VC  $\text{Ca}^{2+}$  transients were associated with egg-  
277 laying events while only 35% were associated with vulval muscle twitches, a significant  
278 difference from control animals not subjected to HSN optogenetic stimulation that we attribute  
279 to an increase in egg laying frequency ([Figure 2F](#)). Because VC  $\text{Ca}^{2+}$  activity rises at the same  
280 time as vulval opening and prior to egg release, these results are consistent with either a model  
281 where the VCs promote vulval muscle contractility, or a model where the VCs are activated in  
282 response to downstream vulval muscle contraction.

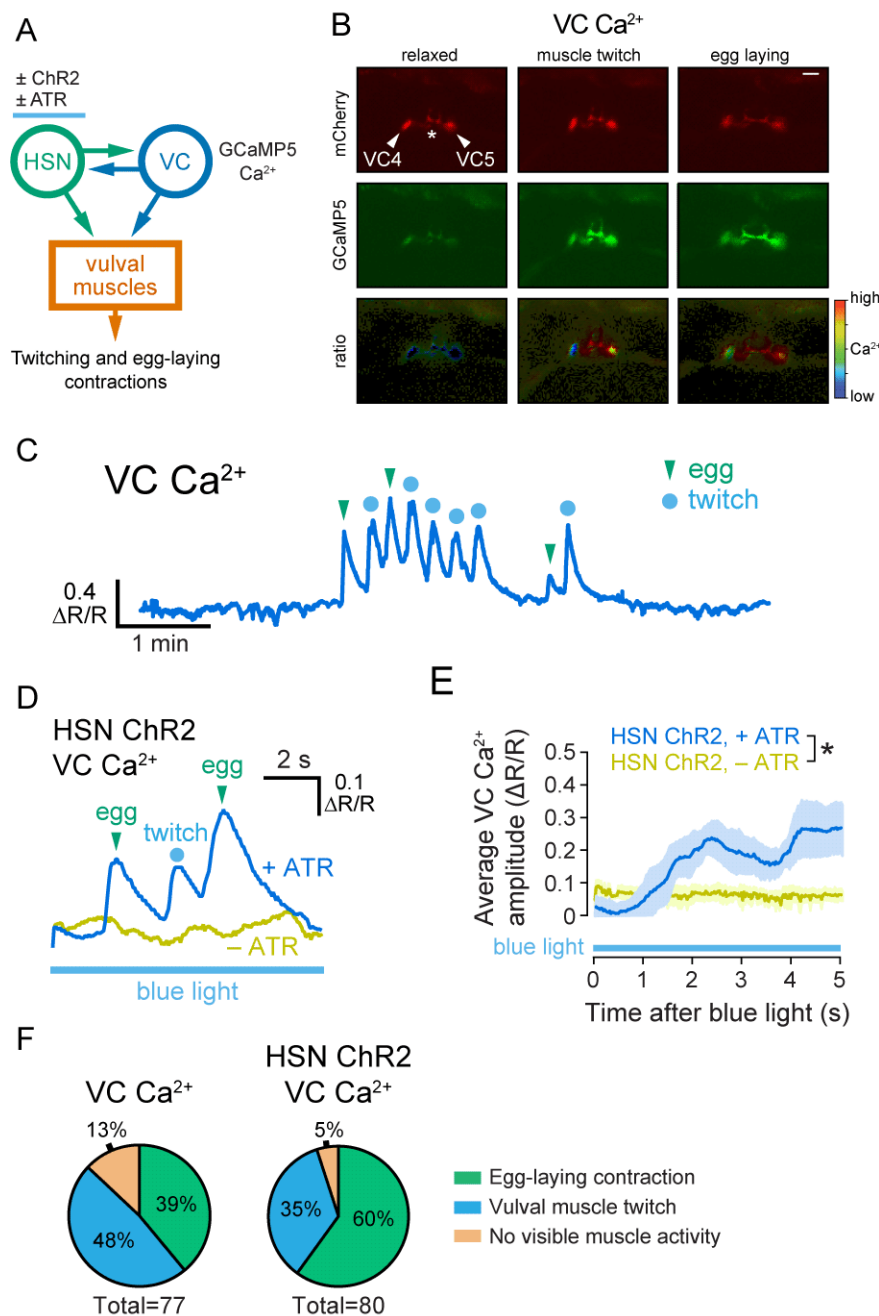

283

284 **Figure 2. The VC neurons are active during both weak vulval muscle twitching and strong**  
 285 **egg-laying contractions.**

286 **(A)** Cartoon of the circuit and experimental manipulations. GCaMP5 was expressed in the VC  
 287 neurons to record Ca<sup>2+</sup> activity, and Channelrhodopsin-2 was expressed in HSNs to provide  
 288 optogenetic stimulation of egg laying. **(B)** Representative still images of VC mCherry, GCaMP5,  
 289 and GCaMP5/mCherry ratio (ΔR/R) during inactive and active egg-laying behavior states.  
 290 Asterisk indicates vulva. Scale bar is 20 μm. **(C)** Representative trace of VC GCaMP5/mCherry  
 291 Ca<sup>2+</sup> ratio in freely behaving, wild-type animals during an egg-laying active state. **(D)**  
 292 Representative trace of VC GCaMP5/mCherry Ca<sup>2+</sup> ratio after optogenetic stimulation of ChR2



293 in the HSN neurons in animals grown in the absence (-ATR, top) and presence (+ATR, bottom)  
294 during 10 s of continuous blue light exposure. (E) Average vulval muscle  $\text{Ca}^{2+}$  levels (mean  
295  $\pm 95\%$  confidence intervals; asterisk indicates  $p < 0.0001$ , Student's t test;  $n = 10$ ). (F) Graph  
296 showing vulval muscle contractile activity for each VC  $\text{Ca}^{2+}$  transient during endogenous egg-  
297 laying active states (left) or in response to HSN optogenetic stimulation (right).  
298

## 299 The VC neurons promote vulval muscle activity and contraction

300 The VC motor neurons synapse onto the vulval and body wall muscles where they are  
301 thought to release ACh to drive contraction (Duerr et al., 2008; White et al., 1986; Zhang et al.,  
302 2008). While VC activity and neurotransmission is not required for egg laying (Figure 1G and  
303 1K; Laura E. Waggoner et al., 1998), the VCs may still release ACh to regulate vulval muscle  
304 contractility. To test if the VCs can excite the vulval muscles directly, we expressed  
305 Channelrhodopsin-2 in the VC neurons and performed ratiometric  $\text{Ca}^{2+}$  imaging in the vulval  
306 muscles after exposure to blue light (Figure 3A; Movie 2). Optogenetic stimulation of the VCs  
307 led to an acute induction of vulval muscle  $\text{Ca}^{2+}$  activity within 5 s but was unable to drive full  
308 vulval muscle contractions and egg release (Figure 3B and 3C). However, average vulval muscle  
309  $\text{Ca}^{2+}$  transient amplitude after optogenetic stimulation was not significantly higher through the  
310 duration of the recording (Figure 3D). Vulval muscle  $\text{Ca}^{2+}$  transient frequency was reduced,  
311 which may result from the increased duration of each individual transient (Figures 3E and 3F).  
312 This result shows that VC activity alone is not able to maximally excite the vulval muscles to the  
313 point of egg laying, but that VC activity is excitatory and can sustain ongoing vulval muscle  $\text{Ca}^{2+}$   
314 activity. We find these results consistent with a model where serotonin and NLP-3 neuropeptides  
315 released from the HSNs signal to enhance the excitability and contractility of the vulval muscles  
316 for egg laying (Brewer et al., 2019), while the ACh released from the VCs prolong the contractile  
317 phase to facilitate egg release.

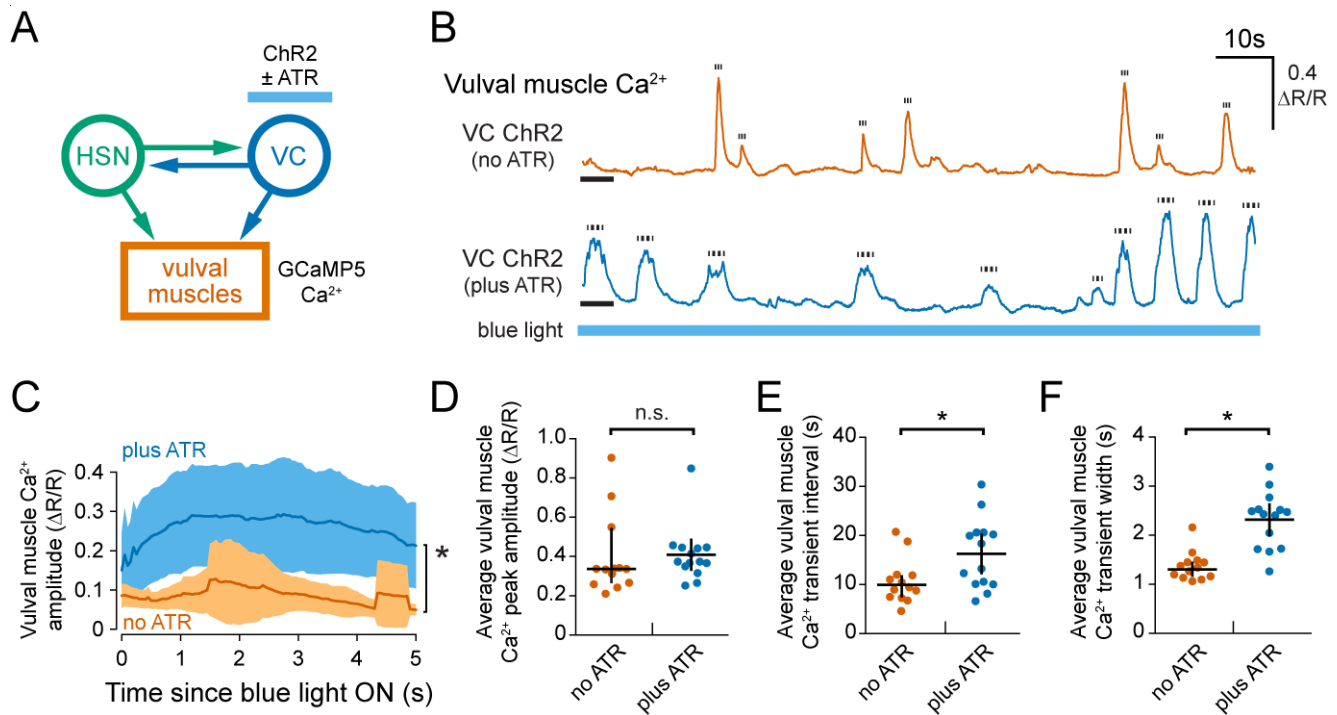

318

319 **Figure 3. Optogenetic VC activation induces and sustains vulval muscle Ca<sup>2+</sup> activity.**

320 **(A)** Cartoon of circuit and experiment. Channelrhodopsin-2 was expressed in the VC neurons and  
 321 GCaMP5 was expressed in the vulval muscles. **(B)** Representative traces of vulval muscle  
 322 GCaMP5/mCherry Ca<sup>2+</sup> ratio (ΔR/R) in animals grown in the absence (-ATR, top) or presence  
 323 (+ATR, bottom) in response to 5 minutes of continuous blue light exposure. Tick marks show  
 324 duration at half-maximal amplitude of each measured Ca<sup>2+</sup> transient. Black bar indicates first 5  
 325 seconds following blue light exposure. **(C)** Averaged vulval muscle Ca<sup>2+</sup> transient activity  
 326 (shaded region indicates ±95% confidence intervals) during the first 5 seconds of optogenetic  
 327 activation of the VC neurons in -ATR (control; blue) and +ATR conditions (orange; asterisk  
 328 indicates  $p=0.003$ , Student's  $t$  test;  $n \geq 13$  animals). **(D)** Scatterplot showing the average peak  
 329 amplitude of vulval muscle Ca<sup>2+</sup> transients (±95% confidence intervals) per animal in response  
 330 to VC optogenetic stimulation during 5 minutes of continuous blue light (n.s. indicates  $p > 0.05$ ;  
 331 Student's  $t$  test;  $n \geq 13$  animals). **(E)** Scatterplot showing the average time between vulval muscle  
 332 Ca<sup>2+</sup> transients (±95% confidence intervals) per animal during VC optogenetic stimulation during  
 333 5 minutes of continuous blue light (asterisk indicates  $p=0.0236$ , Student's  $t$  test;  $n \geq 13$  animals).  
 334 **(F)** Scatterplot showing the average vulval muscle Ca<sup>2+</sup> transient width (±95% confidence  
 335 intervals) per animal during VC optogenetic stimulation during 5 minutes of continuous blue light  
 336 (asterisk indicates  $p < 0.0001$ , Student's  $t$  test;  $n \geq 13$  animals; error bars indicate 95% confidence  
 337 intervals for the mean).

338

339 **The VCs facilitate successful vulval opening during egg laying**

340 Loss of VC activity or synaptic transmission caused a specific defect in serotonin-induced  
341 egg laying, suggesting the VCs are required for proper vulval muscle  $\text{Ca}^{2+}$  activity and/or  
342 contractility. We recorded vulval muscle  $\text{Ca}^{2+}$  activity in freely behaving animals transgenically  
343 expressing TeTx in the VCs (Figure 4A; Movie 3). Vulval muscle  $\text{Ca}^{2+}$  activity in wild-type animals  
344 is characterized by low activity during the ~20 minute egg-laying inactive state, and periods of  
345 high activity during the ~2 minute egg-laying active state (Figure 4B; Collins et al., 2016; Laura  
346 E. Waggoner et al., 1998). Expression of TeTx in the VCs did not significantly affect the overall  
347 frequency or amplitude of vulval muscle  $\text{Ca}^{2+}$  transients during egg-laying inactive states  
348 compared to wild-type control animals (Figures 4C and 4D). However, inhibition of VC  
349 neurotransmission led to larger amplitude  $\text{Ca}^{2+}$  transients during the active phase (Figure 4D).  
350 Since previous work suggested the VCs release ACh that inhibits egg laying (Bany et al., 2003),  
351 the simplest explanation for this phenotype would be that the VCs normally inhibit vulval muscle  
352  $\text{Ca}^{2+}$  activity. However, our results show optogenetic activation of the VCs increased vulval  
353 muscle  $\text{Ca}^{2+}$  transient duration with minimal effect on amplitude (Figures 3C, 3D, and 3F).  
354 Further inspection of vulval muscle  $\text{Ca}^{2+}$  traces of individual animals showed that transgenically  
355 expressing TeTx in the VCs had large vulval muscle  $\text{Ca}^{2+}$  transients of amplitude similar to egg-  
356 laying  $\text{Ca}^{2+}$  transients ( $>1.0 \Delta\text{R}/\text{R}$ ), but without an egg being successfully released (Figure 4B  
357 and 4E; Movie 3). These large amplitude transients that did not lead to egg laying were thus  
358 termed “failed egg-laying events.” Such failed egg-laying events were infrequent in vulval muscle  
359  $\text{Ca}^{2+}$  recordings from wild-type animals, but they occurred more frequently than successful egg-  
360 laying events in transgenic animals expressing TeTx in the VCs (Figure 4E). Based on these  
361 results, it appears that VC neurotransmission does not initiate vulval muscle  $\text{Ca}^{2+}$  transients but  
362 is instead critical for coordinating vulval muscle  $\text{Ca}^{2+}$  activity and contraction across the vulval  
363 muscle cells to allow for successful egg release.

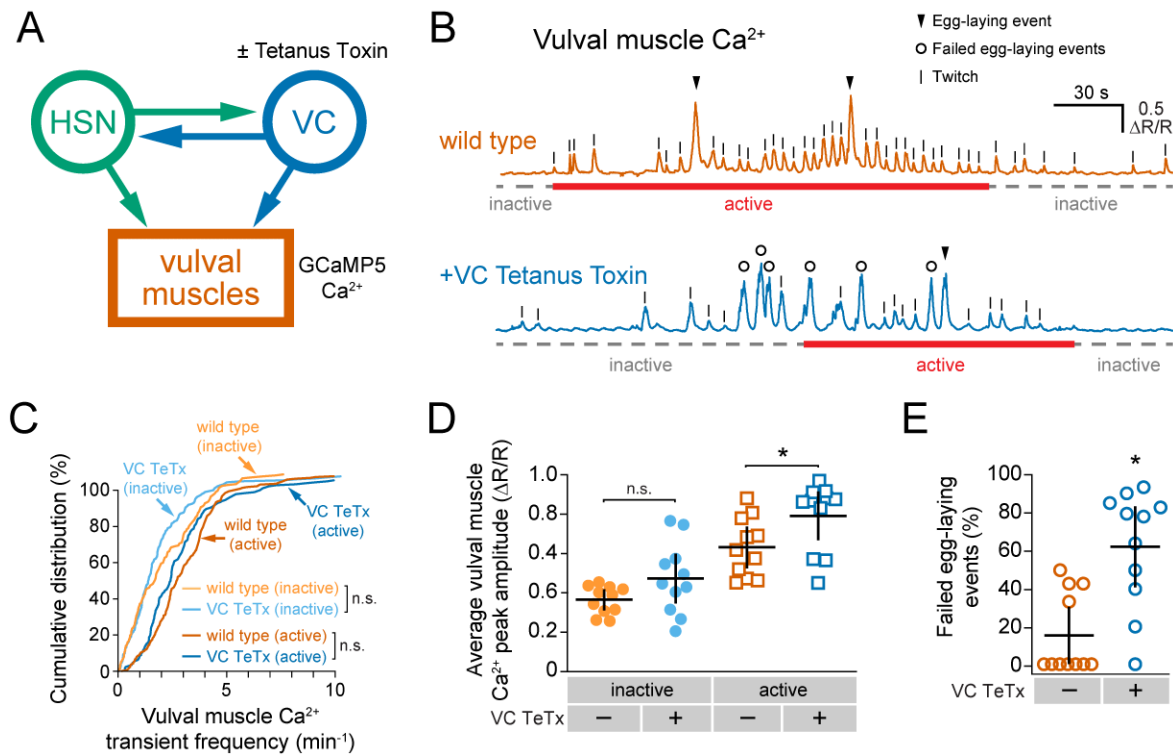

364

365 **Figure 4. Blocking VC neurotransmission reduces the success rate of egg laying.**

366 (A) Cartoon of circuit and experiment. TeTx was expressed in the VC neurons to block their  
 367 neurotransmitter release and GCaMP5 was expressed in the vulval muscles to record Ca<sup>2+</sup>  
 368 activity. (B) Representative traces of vulval muscle GCaMP5/mCherry Ca<sup>2+</sup> ratio (ΔR/R) in wild-  
 369 type (top) and TeTx expressing transgenic animals (bottom). Arrowheads indicate successful  
 370 egg-laying events, and open circles indicate strong (>1.0 ΔR/R) vulval muscle Ca<sup>2+</sup> transients of  
 371 “failed egg-laying events.” Egg-laying behavior state (inactive or active) duration is indicated  
 372 below each trace. (C) Cumulative distribution plots of all vulval muscle Ca<sup>2+</sup> transients across  
 373 wild-type and transgenic animals expressing TeTx in the VCs. Transients were parsed into egg-  
 374 laying active and inactive phases (n.s. indicates p > 0.05, Kruskal-Wallis test with Dunn's  
 375 correction for multiple comparisons; n ≥ 200 transients from 11 animals). (D) Average vulval  
 376 muscle Ca<sup>2+</sup> transient peak amplitudes per animal during the inactive and active egg-laying  
 377 phase (asterisk indicates p = 0.0336, one-way ANOVA with Bonferroni's correction for multiple  
 378 comparisons; n = 11 animals). (E) Percentage of failed egg-laying events in wild-type and  
 379 transgenic animals expressing TeTx in the VCs (asterisk indicates p = 0.0014, Mann-Whitney  
 380 test; n = 11 animals).

381

382 Egg laying occurs when strong vulval muscle Ca<sup>2+</sup> activity drives the synchronous  
 383 contraction of all the vulval muscle cells (Brewer et al., 2019; Li et al., 2013) that allows for the  
 384 mechanical opening of the vulva in phase with locomotion for efficient egg release (Collins et al.,

385 2016; Collins & Koelle, 2013). Egg-laying events are characterized by coordinated  $\text{Ca}^{2+}$  activity  
386 between the vm1 vulval muscles that extend to the ventral tips of the vulva and the medial vm2  
387 vulval muscles, leading to full contraction and egg release (Figure 5A). This  $\text{Ca}^{2+}$  activity is  
388 distinct from weak vulval muscle twitching contractions that are confined to the vm1 muscles  
389 (Figure 5A; Collins & Koelle, 2013). Failed egg-laying events exhibit  $\text{Ca}^{2+}$  activity more similar  
390 to egg-laying events, where  $\text{Ca}^{2+}$  signal is high across both vm1 and vm2 muscles (Figure 5A).  
391 To understand why egg laying was less likely to occur during strong vulval muscle  $\text{Ca}^{2+}$   
392 transients in VC neurotransmission-inhibited animals, we measured features of contractile  
393 events during egg laying. Contraction can be directly quantified by measuring the reduction in  
394 muscle area in fluorescent micrographs, and vulval opening can be quantified by measuring the  
395 changing distance between the vulval muscle cells positioned anterior and those posterior to the  
396 vulval slit (Figure 5A). During egg-laying events in wild-type animals, a strong cytosolic  $\text{Ca}^{2+}$   
397 transient correlates with a  $\sim 50 \mu\text{m}^2$  contraction of muscle size followed by a rebound phase after  
398 egg release (Figure 5B, top and middle). Simultaneously, the anterior and posterior muscles  
399 separate by  $\sim 10 \mu\text{m}$ , facilitating egg release (Figure 5B, bottom). We found differences in the  
400 kinetics and extent of vulval muscle opening between wild-type and TeTx-expressing transgenic  
401 animals during successful egg-laying events (compare Figures 5B and 5C). The vulval muscles  
402 opened wider and the degree of contraction was greater during egg-laying events in animals  
403 where VC neurotransmission was inhibited with TeTx (Figure 5C), possibly because the vulval  
404 muscle  $\text{Ca}^{2+}$  rise started earlier in these animals. During failed egg-laying events, the vulval  
405 muscles showed only modest contraction and only separated by  $\sim 5 \mu\text{m}$ , insufficient to allow egg  
406 release, despite reaching similar levels of cytosolic  $\text{Ca}^{2+}$  (Figure 5D). Animals with blocked VC  
407 neurotransmission exhibited even less separation of the vulval muscles during failed egg-laying  
408 events (compare Figures 5D and 5E). In contrast to wild type animals, animals with inhibited VC  
409 neurotransmission have many more failed egg-laying events during which they exhibit vulval

410 opening kinetics more similar to twitches (compare [Figure 5F and 5G](#)). To understand the  
411 relationship between vulval muscle  $\text{Ca}^{2+}$  levels and vulval opening, we measured the distance  
412 between anterior and posterior vulval muscles during weak twitching, failed egg-laying events,  
413 and successful egg-laying events ([Figure 5F](#)). In both wild-type and TeTx-expressing animals,  
414 we noted a linear relationship of low but positive slope between vulval opening and  $\text{Ca}^{2+}$  levels  
415  $<1.0 \Delta R/R$  ( $\Delta\text{opening} / \Delta\text{Ca}^{2+}$ ) during weak twitching contractions ([Figure 5F and 5G](#)). However,  
416 as  $\text{Ca}^{2+}$  levels rose above  $1.0 \Delta R/R$ , the muscles reached threshold for full opening, allowing  
417 successful egg release ([Figure 5F](#)). The steep, linear  $\Delta\text{opening} / \Delta\text{Ca}^{2+}$  relationship during failed  
418 egg-laying events suggests a threshold of  $\text{Ca}^{2+}$  drives an all-or-none transition to full contraction,  
419 vulval opening, and egg release. In VC neurotransmission-inhibited animals, the shallow  
420  $\Delta\text{opening} / \Delta\text{Ca}^{2+}$  relationship continued as weak twitches transitioned into failed egg-laying  
421 events, with many strong vulval muscle  $\text{Ca}^{2+}$  transients failing to open the vulva sufficiently for  
422 egg release ([Figure 5G](#)). However, successful egg-laying events in VC neurotransmission-  
423 inhibited animals still showed a sharp threshold between  $\text{Ca}^{2+}$  levels and the degree of vulval  
424 opening. This raises the possibility of two types of failed egg-laying events: one that is shared  
425 with wild-type animals, and another that is unique to animals with inhibited VC  
426 neurotransmission.

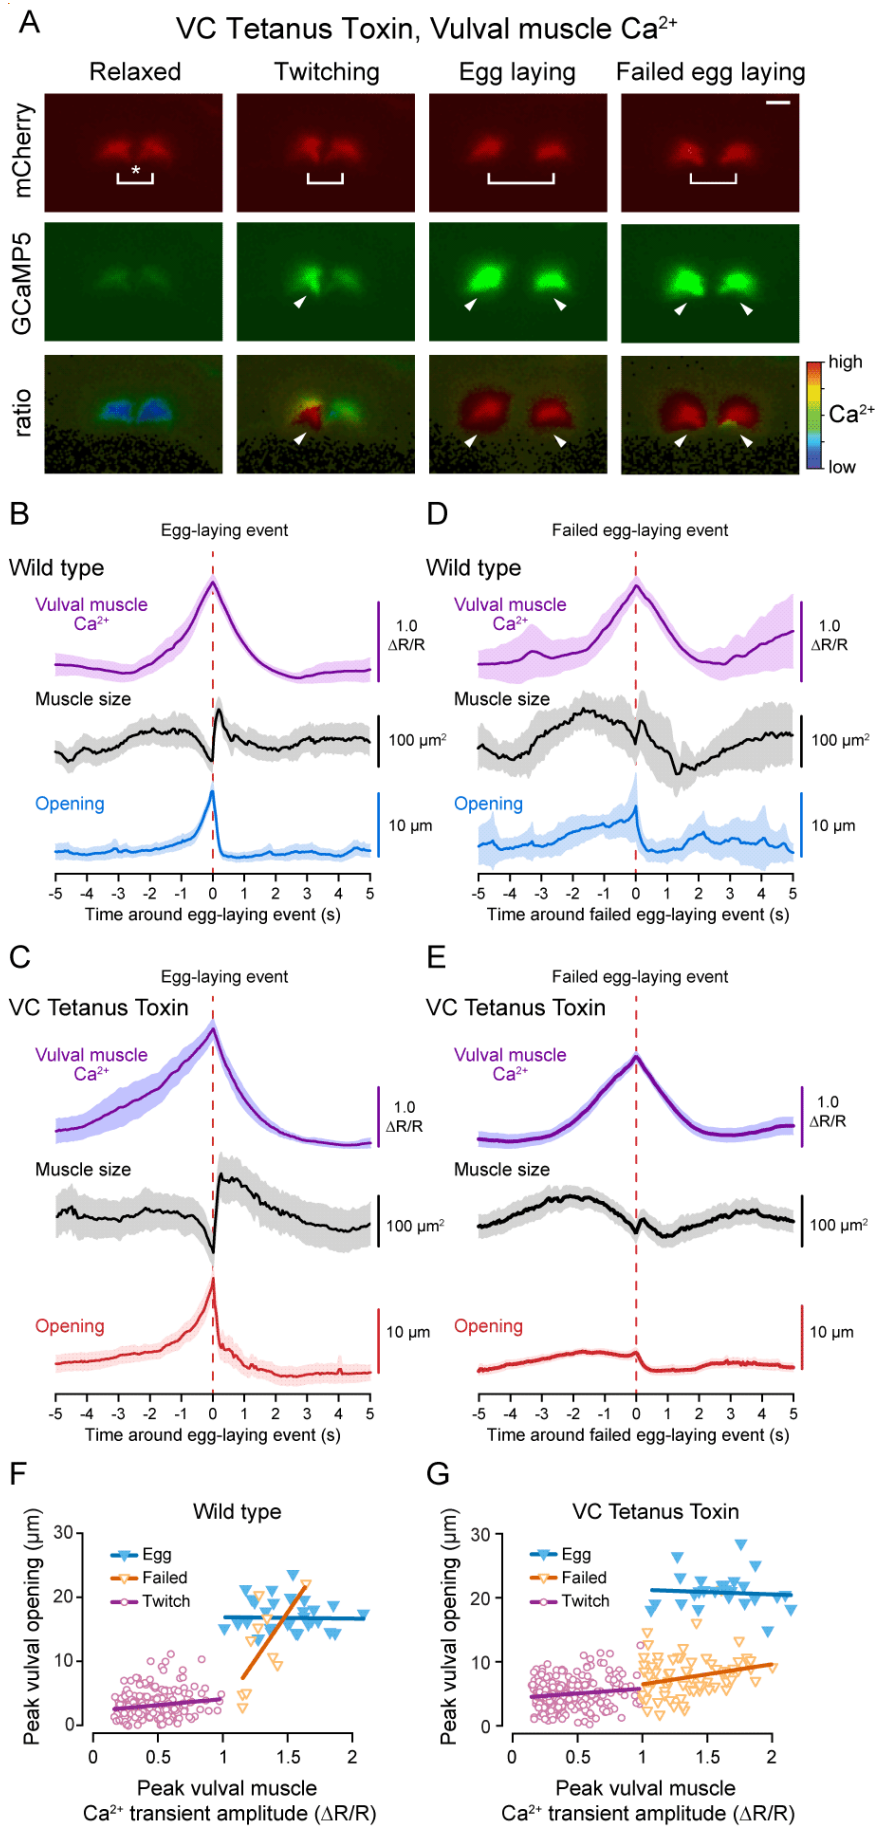

428 **Figure 5. Blocking VC neurotransmission decouples vulval muscle Ca<sup>2+</sup> activity and egg**  
429 **laying.**

430 (A) Vulval muscle sizes and distances were quantified by measuring the changes in area and  
431 centroid of the anterior and posterior muscle groups in mCherry channel micrographs during  
432 GCaMP5/mCherry ratiometric imaging. Shown are still images of the vulval muscles during  
433 representative muscle states of relaxation, twitching, egg laying, and failed egg-laying events.  
434 Brackets indicate the distance between the centroid of vulval muscle halves, arrowheads  
435 indicate high Ca<sup>2+</sup> activity, and asterisk indicates vulva. Scale bar is 20 μm. (B-D) Mean traces  
436 (±95 confidence intervals) of vulval muscle Ca<sup>2+</sup> (GCaMP5/mCherry ratio), vulval muscle area  
437 (μm<sup>2</sup>), and vulval muscle centroid distance (μm) during successful (B and C; n≥26 from 11  
438 animals) and failed egg-laying events (D and E; n≥10 from 11 animals) in wild-type (B and D)  
439 and transgenic animals expressing TeTx in the VC neurons (C and E). (E-F) Scatter plot showing  
440 peak vulval muscle Ca<sup>2+</sup> amplitude in relation to the corresponding vulval muscle opening  
441 distance in wild-type (E) and transgenic animals expressing TeTx in the VC neurons (F). Lines  
442 through points represent simple linear regression for each labeled grouping.  
443

444 **VC neurotransmission regulates HSN command neuron and egg-laying circuit activity**

445 To determine whether VC synaptic transmission regulates egg laying via HSN, we  
446 recorded HSN Ca<sup>2+</sup> activity in wild-type and transgenic animals expressing TeTx in the VCs  
447 (Figure 6A). During the egg-laying active state, the HSNs drive egg laying during periods of  
448 increased Ca<sup>2+</sup> transient frequency in the form of burst firing (Figure 6B; Collins et al., 2016; Ravi  
449 et al., 2018a). We observed a significant increase in HSN Ca<sup>2+</sup> transient frequency when VC  
450 synaptic transmission was blocked compared to non-transgenic control animals (Figure 6C).  
451 Wild-type animals spent ~11% of their time exhibiting high frequency burst activity in the HSN  
452 neurons, while transgenic animals expressing TeTx in the VC neurons spent ~21% of their time  
453 exhibiting HSN burst firing activity (Figure 6D). These results are consistent with the  
454 interpretation that VC neurotransmission is inhibitory toward the HSNs such as proposed in  
455 previous studies (Bany et al., 2003; Zhang et al., 2008), but the steady-state egg accumulation  
456 of animals expressing VC-specific TeTx or HisCl is normal (Figure 1G, K). We have previously  
457 shown that HSN burst firing is regulated by egg accumulation and feedback of vulval muscle



458  $\text{Ca}^{2+}$  activity (Ravi et al., 2018a), which could be enhanced by the high rate of failed egg-laying  
459 events observed in VC TeTx transgenic animals (**Figure 5E**). We propose that the increased  
460 HSN burst firing seen in VC TeTx transgenic animals does not solely result from loss of inhibitory  
461 VC input, but also reflects the circuit prolonging the active state to compensate for more failed  
462 egg-laying transients in the absence of excitatory VC input.

463

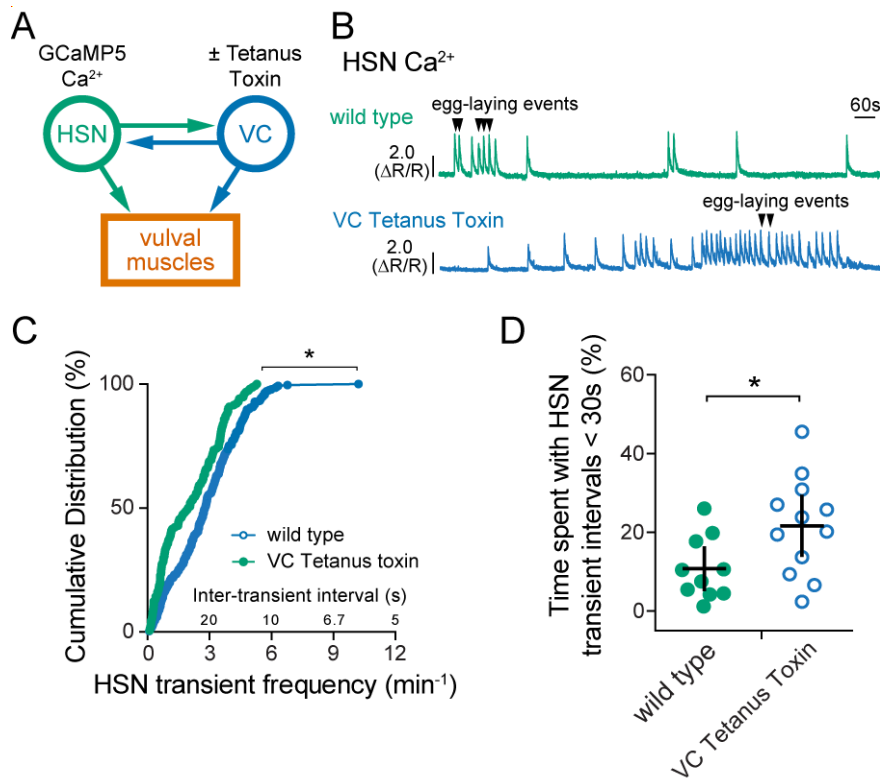

464

465 **Figure 6. Blocking VC neurotransmission increases HSN Ca<sup>2+</sup> activity.**

466 (A) Cartoon of circuit and the experiment. TeTx was expressed in the VC neurons to block their  
467 neurotransmitter release and HSN Ca<sup>2+</sup> activity was recorded through GCaMP5 imaging. (B)  
468 Representative traces of HSN neuron GCaMP5/mCherry Ca<sup>2+</sup> ratio ( $\Delta R/R$ ) in a wild-type  
469 background (top, green) and animals expressing TeTx in the VCs (bottom, blue). (C) Cumulative  
470 distribution plots of the instantaneous frequency of HSN Ca<sup>2+</sup> transients in wild-type and TeTx-  
471 expressing animals (asterisk indicates  $p=0.0006$ , Kolmogorov-Smirnov test;  $n \geq 154$  from  $\geq 10$   
472 animals). (D) Scatter plot for the percentage of time each animal spent with HSN Ca<sup>2+</sup>  
473 inter-transient intervals that were less than 30 seconds, an indicator of hyperactivity (asterisk indicates  
474  $p=0.00272$ , Student's test;  $n \geq 10$ ; error bars indicate 95% confidence intervals for the mean).  
475

475

476 **The VC motor neurons are responsive to vulval muscle activity and contraction**

477 VC Ca<sup>2+</sup> activity is coincident with strong vulval muscle twitching and egg-laying  
478 contractions (Figure 2; Collins et al., 2016). In addition to making synapses onto the vm2  
479 muscles whose contraction drives egg laying, the VCs extend neurites along the vulval  
480 hypodermis devoid of synapses (White et al., 1986), suggesting the VCs may respond to vulval  
481 opening. To test this model, we sought to induce vulval opening independent of endogenous

481

482 circuit activity and presynaptic input from the HSNs. We transgenically expressed  
483 Channelrhodopsin-2 specifically in the vulval muscles using the *ceh-24* promoter to stimulate  
484 the vulval muscles and used GCaMP5 to record blue-light induced changes in vulval muscle  
485  $\text{Ca}^{2+}$  activity (Figure 7A). Optogenetic stimulation of the vulval muscles triggered an immediate  
486 rise in vulval muscle cytosolic  $\text{Ca}^{2+}$ , tonic contraction of the vulval muscles, vulval opening, and  
487 egg release (Figures 7B and 7C). Even though optogenetic stimulation resulted in sustained  
488 vulval muscle  $\text{Ca}^{2+}$  activity and contraction, vulval opening and egg release remained rhythmic  
489 and phased with locomotion, as previously observed in wild-type animals (Collins et al., 2016;  
490 Collins & Koelle, 2013). Simultaneous bright field recordings showed the vulva only opened for  
491 egg release when the adjacent ventral body wall muscles were in a relaxed phase (Movie 4).  
492 We have previously shown that eggs are preferentially released when the vulva is at a particular  
493 phase of the body bend, typically as the ventral body wall muscles anterior to the vulva go into  
494 a more relaxed state (Collins et al., 2016; Collins & Koelle, 2013). We now interpret this phasing  
495 of egg release with locomotion as evidence that vulval muscle  $\text{Ca}^{2+}$  activity drives contraction,  
496 but the vulva only opens for successful egg release when contraction is initiated during relaxation  
497 of the adjacent body wall muscles. Together, these results show that optogenetic stimulation of  
498 the vulval muscles is sufficient to induce vulval muscle  $\text{Ca}^{2+}$  activity for egg-release in a  
499 locomotion phase-dependent manner.

500 To test the hypothesis that the VCs respond to vulval muscle activation, we recorded  
501 changes in VC  $\text{Ca}^{2+}$  upon optogenetic stimulation of the vulval muscles (Figure 7D). We  
502 observed a robust induction of VC  $\text{Ca}^{2+}$  activity upon blue light illumination (Figures 7E and 7F).  
503 The rise in VC  $\text{Ca}^{2+}$  occurred before the first egg-laying event, suggesting that this process is  
504 dependent on muscle activity and not necessarily the passage of an egg (Figure 7G; Movie 5).

505 This result demonstrates that the VCs can become excited in response to activity of the  
506 postsynaptic vulval muscles.

507 How do the vulval muscles activate the VCs? The VCs make both chemical and electrical  
508 synapses onto the vm2 vulval muscles (Cook et al., 2019; White et al., 1986). Depolarization of  
509 the vm2 vulval muscles might be expected to electrically propagate to the VC and trigger an  
510 increase in VC  $Ca^{2+}$  activity. Another possibility is that the VCs are mechanically activated in  
511 response to vulval muscle contraction and/or vulval opening. To test these alternate models, we  
512 optogenetically stimulated the vulval muscles of *unc-54* muscle myosin mutants, which are  
513 unable to contract their muscles, and recorded VC  $Ca^{2+}$  activity (Figure 7D). We found  
514 optogenetic activation of the vulval muscles failed to induce VC  $Ca^{2+}$  activity in *unc-54* mutants  
515 compared to the wild-type background (Figures 7G and 7H). While *unc-54* mutants appear to  
516 show some increase in VC  $Ca^{2+}$  activity following blue light stimulation of the vulval muscles,  
517 this increase was not statistically significant, suggesting indirect excitation of the VCs through  
518 gap junctions is insufficient on its own to induce robust VC  $Ca^{2+}$  activity. Together, these results  
519 support a model where the VC neurons are mechanically activated in response to vulval muscle  
520 contraction. Mechanical activation appears to drive VC activity and is mediated through the VC4  
521 and VC5 neurites which are most proximal to the vulval canal through which eggs are laid.

522

523

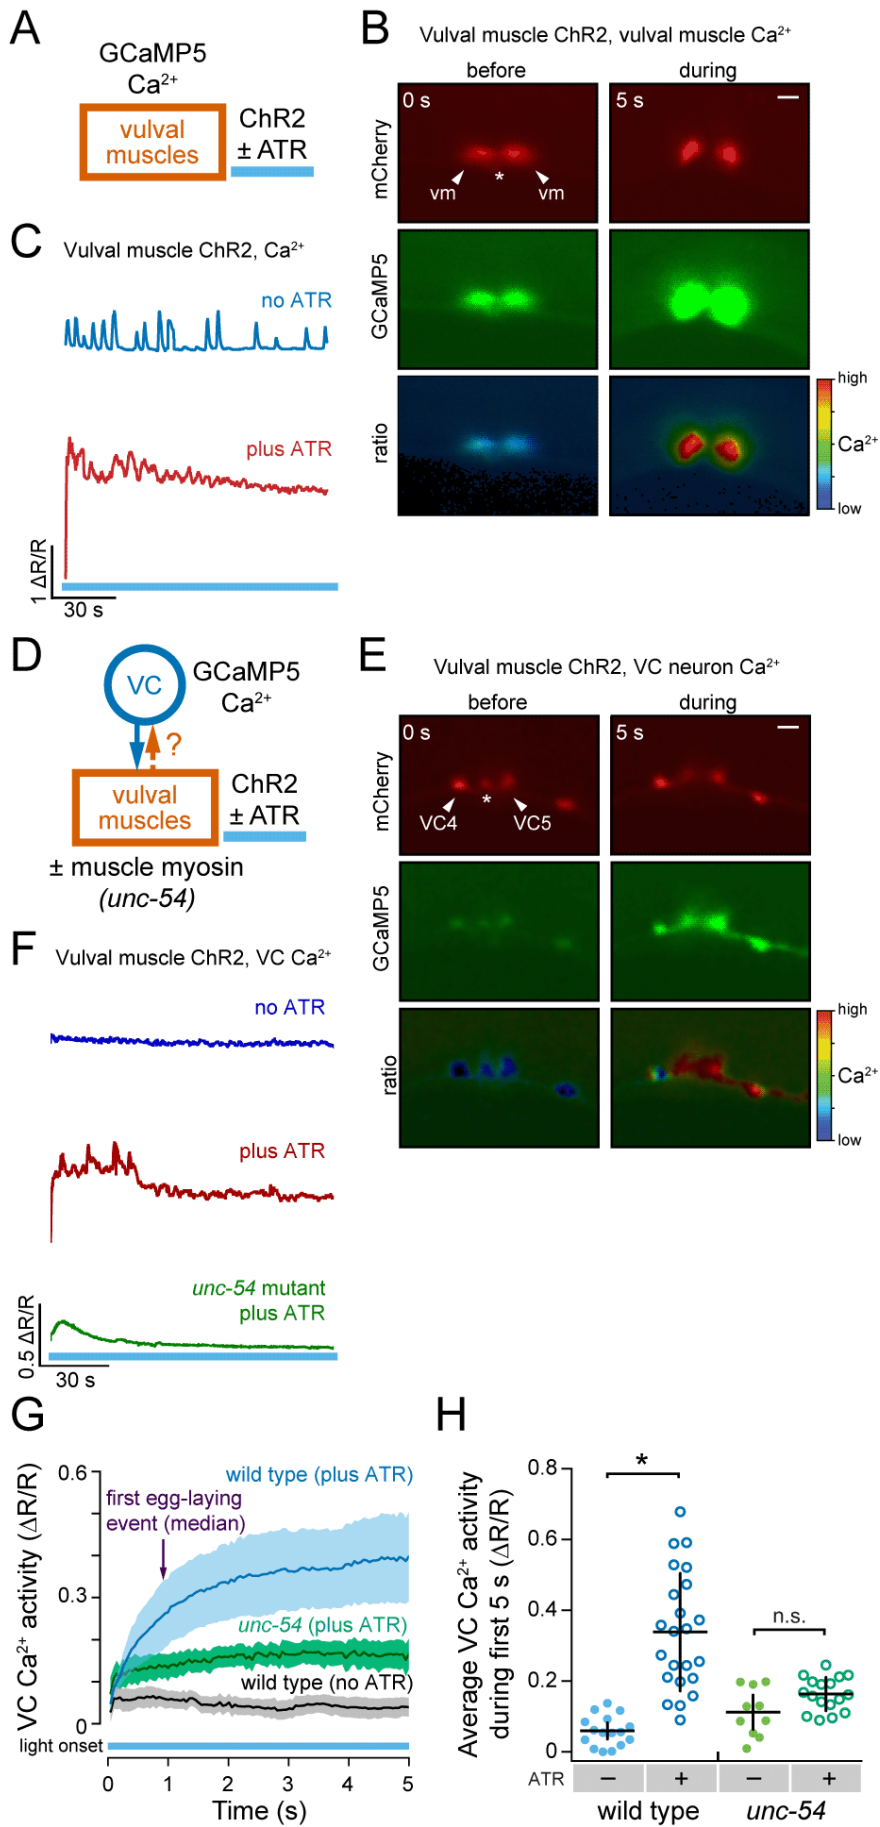

525 **Figure 7. Optogenetic activation and contraction of the vulval muscles drives VC neuron**  
526 **activity.**

527 **(A)** Cartoon of experiment. Channelrhodopsin-2 and GCaMP5 were expressed in the vulval  
528 muscles to monitor cytosolic  $\text{Ca}^{2+}$  after optogenetic stimulation. **(B)** Representative still images  
529 of vulval muscle mCherry, GCaMP5, and GCaMP5/mCherry ratio during optogenetic activation  
530 of the vulval muscles. Arrowheads indicate each vulval muscle half, and asterisk indicates vulva.  
531 Scale bar is 20  $\mu\text{m}$ . **(C)** Representative traces of vulval muscle GCaMP5/mCherry  $\text{Ca}^{2+}$  ratio  
532 ( $\Delta R/R$ ) in animals expressing ChR2 in the vulval muscles in the absence (-ATR, top) or presence  
533 (+ATR, bottom) of all-*trans* retinal during 3 minutes of continuous blue light exposure. **(D)**  
534 Cartoon of circuit and experiment. Channelrhodopsin-2 was expressed in the vulval muscles and  
535 GCaMP5 was expressed in the VC neurons to record  $\text{Ca}^{2+}$  activity in wild-type or *unc-54* myosin  
536 null mutant animals. **(E)** Representative still images of VC neuron mCherry, GCaMP5, and  
537 GCaMP5/mCherry ratio during optogenetic activation of the vulval muscles. Arrowheads indicate  
538 VC neuron cell bodies, and asterisk indicates vulva. Scale bar is 20  $\mu\text{m}$ . **(F)** Representative  
539 traces of VC neuron GCaMP5/mCherry  $\text{Ca}^{2+}$  ratio ( $\Delta R/R$ ) in animals expressing ChR2 in the  
540 vulval muscles in the absence (-ATR, top) or presence (+ATR, bottom) of all-*trans* retinal during  
541 3 minutes of continuous blue light exposure. **(G)** Averaged VC  $\text{Ca}^{2+}$  responses during the first 5  
542 s. Error bands represent  $\pm 95$  confidence intervals for the mean;  $n \geq 10$  animals. **(H)** Scatter plot  
543 showing the average VC  $\text{Ca}^{2+}$  response during the first 5 seconds of optogenetic stimulation of  
544 the vulval muscles. Asterisk indicates  $p < 0.0001$ ; n.s. indicates  $p > 0.05$  (one-way ANOVA with  
545 Bonferroni's correction for multiple comparisons;  $n \geq 10$  animals).

546

547

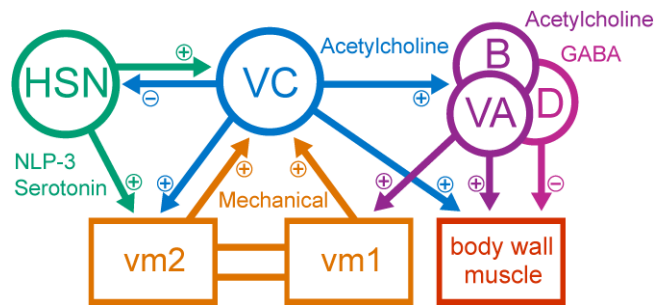

548

549 **Figure 8. The VC neurons function to coordinate synchronized contraction of the vulval**  
550 **muscles for egg laying in response to serotonin-mediated potentiation.**

551 Working model of the functional connectivity within the *C. elegans* egg-laying circuit (Cook et al.,  
552 2019; White et al., 1986). Plus and minus signs indicate excitatory and inhibitory input,  
553 respectively. HSN command neurons release serotonin and NLP-3 to potentiate the VCs and  
554 vm2 vulval muscles (Figure 1 and Figure 2; Collins et al., 2016; Shyn et al., 2003; Waggoner et  
555 al., 1998; Zhang et al., 2008). VC neurons release acetylcholine that excites the vm2 vulval  
556 muscles, body wall muscles, and the VA/VB/VD locomotion motor neurons (Figure 3; Collins et  
557 al., 2016; Kim et al., 2001), as well as acetylcholine to inhibit the HSNs (Figure 6; Bany et al.,  
558 2003; Zhang et al., 2008). The VA/VB/VD neurons release acetylcholine and GABA onto the  
559 body wall muscles to regulate locomotion (Richmond & Jorgensen, 1999; Zhen & Samuel, 2015),  
560 and onto the vm1 vulval muscles to initiate contractions for egg laying (Collins et al., 2016;  
561 Collins & Koelle, 2013). Contraction of the vm1 vulval muscles electrically excites the vm2 vulval  
562 muscles and mechanically activates the VCs (Figure 7), forming a positive feedback loop until  
563 all vulval muscle cells are contracted and egg laying occurs.

## 564 **Discussion**

565 The connectome of *C. elegans* has greatly informed neural circuit studies and contributed to  
566 studies revealing that connectivity alone is not sufficient to explain nervous system operations  
567 (Bargmann, 2012; Bentley et al., 2016). In the present study, we examined the neural circuit  
568 driving egg-laying behavior in *C. elegans* at a cellular resolution to reveal functional pathways  
569 and elements of the behavior that had not been discernable through connectome or prior genetic  
570 studies (Figure 8). We show that the cholinergic VC motor neurons contribute to egg laying in a  
571 serotonergic pathway. Our data show that HSN activity acts to excite the vulval muscles and  
572 VCs, and that VC Ca<sup>2+</sup> activity is closely associated with visible vulval muscle contraction. In the  
573 absence of HSN-mediated potentiation, the VCs are able to excite the vulval muscles, but not to

574 the threshold required for egg laying. This sub-threshold interaction is consistent with a model  
575 where serotonin-mediated potentiation of the VCs and vulval muscles is required before the VCs  
576 can facilitate egg laying through timely excitatory input. In the absence of VC neurotransmission,  
577 the HSNs and the vulval muscles show excess  $\text{Ca}^{2+}$  activity, but this excess activity does not  
578 correspond to increased egg laying. Instead, we find that the vulval muscles are less efficient at  
579 opening the vulva, indicating the VCs have a role in facilitating vulval muscle contraction.  
580 Surprisingly, optogenetic activation and contraction of the postsynaptic vulval muscles is  
581 sufficient to drive presynaptic VC  $\text{Ca}^{2+}$  activity. We propose that serotonin released from the  
582 HSNs signals to promote both vulval muscle contractility and VC sensitivity to that contraction.  
583 Following this potentiation, vulval muscle twitch contractions are able to mechanically activate  
584 the VCs to release excitatory ACh as part of a positive-feedback loop until the vulval muscles  
585 are fully contracted and egg laying occurs.

586 Many behaviors require downstream feedback to help fine-tune movements and make  
587 adjustments based on the changing internal and external environment, such as with wing-beat  
588 patterns in *Drosophila* or head-eye coordination in humans (Bartussek & Lehmann, 2016; Fang  
589 et al., 2015). We find that the downstream target of the egg-laying neural circuit, the vulval  
590 muscles, signals upstream to facilitate proper completion of the behavior. We postulate that such  
591 feedback signaling is critical for two reasons. First, it can act to feedback inhibit the circuit to  
592 signal when the behavior has been executed. We find that vulval muscle contraction activates  
593 the VCs (Figure 7), which could contribute to inhibition of the egg-laying circuit through release  
594 of ACh acting on metabotropic receptors such as GAR-2 on the HSNs and vulval muscles (Bany  
595 et al., 2003; Fernandez et al., 2020; Zhang et al., 2008, 2010). GAR-2 has previously been  
596 shown to act in parallel with ionotropic receptors to differentially modulate locomotion behavior,  
597 providing both short- and longer-term effects in response to cholinergic signaling (Dittman &



598 Kaplan, 2008; Zhen & Samuel, 2015). Second, feedback signaling could create a positive  
599 feedback loop to facilitate full execution of a behavior. In this circuit model, the VCs are  
600 mechanically activated by vulval muscle twitches which in turn leads to the VCs further exciting  
601 the vulval muscles until ubiquitous and coordinated contraction is achieved. A similar type of  
602 feedback activity has been demonstrated in the *C. elegans* SMDD neurons where TRPC  
603 channels, TRP-1 and TRP-2, are mechanically activated by neck muscle contractions to  
604 influence neck steering behavior (Yeon et al., 2018), as well as the crab cardiac ganglion where  
605 mechanosensitive dendrites receive feedback from the postsynaptic muscles to modify the  
606 ganglion's firing activity (García-Crescioni et al., 2010). Which receptors mediate VC  
607 mechanosensation is not known, but the VCs do express innexin gap junction proteins (Altun et  
608 al., 2009) that have recently been shown to act as mechanosensitive hemichannels (Walker &  
609 Schafer, 2020).

610 Serotonergic modulation of neural circuits and behavior is a well-characterized  
611 phenomena across both invertebrate and vertebrate animals (Bacqué-Cazenave et al., 2020;  
612 Weiger, 1997). In the mouse nociceptive circuit, serotonergic modulation has been shown to  
613 confer hyperalgesia (Bardoni, 2019; Lin et al., 2011). In this circuit, serotonin acts on dorsal root  
614 ganglion neurons to increase their sensitivity to mechanical stimuli through the 5-HT<sub>2B</sub> receptor  
615 (Su et al., 2016), and to maintain this sensitivity through 5-HT<sub>4/6/7</sub> receptors (Godínez-Chaparro  
616 et al., 2011). In the *C. elegans* egg-laying circuit, serotonin released by the HSN command  
617 neurons signals through several G-protein coupled receptors including the 5-HT<sub>2</sub> ortholog SER-  
618 1 and the 5-HT<sub>7</sub> ortholog SER-7 expressed on the vulval muscles (Hapiak et al., 2009; Hobson  
619 et al., 2006; Xiao et al., 2006). These serotonin receptors are thought to act through Ga<sub>q</sub> and  
620 Ga<sub>s</sub> signaling pathways, respectively, which activate EGL-19 L-type voltage-gated Ca<sup>2+</sup>  
621 channels in the vulval muscles to enhance their response to other excitatory input (Schafer,

622 2006; Waggoner et al., 1998; Zhang et al., 2008). SER-7 is also expressed in the VC neurons  
623 (Fernandez et al., 2020), and serotonin acting through SER-7 has been shown to initiate motor  
624 neurons activity in other behaviors, such as feeding (Song et al., 2013). Like animals with  
625 blocked VC neurotransmission (**Figure 1**), *ser-7* mutants also fail to respond to exogenous  
626 serotonin (Hobson et al., 2006). Downstream targets of serotonergic signaling onto the VCs may  
627 include the N/P/Q-type Ca<sup>2+</sup> channel UNC-2 to promote neurotransmitter release (Schafer et al.,  
628 1996). Following serotonergic potentiation, the VCs may be close enough to threshold to  
629 become mechanically excited in response to vm1-mediated vulval muscle twitches, leading to  
630 excitatory VC neurotransmitter release onto the vm2 vulval muscles to drive complete vulval  
631 muscle contraction for egg release.

632         Synaptic wiring diagrams show multiple sites of cross-innervation between the canonical  
633 egg-laying circuit and locomotion circuit (Cook et al., 2019; White et al., 1986). Consistent with  
634 this shared connectivity, egg-laying behavior is correlated with changes in locomotion behavior  
635 (Collins et al., 2016; Hardaker et al., 2001), suggesting that these two circuits actively  
636 communicate and coordinate their respective behaviors. Coordination of distinct neural circuits  
637 and behaviors has been demonstrated in the stomatogastric ganglion of the lobster, where two  
638 overlapping circuits are phase-coordinated with one another to regulate gastric peristalsis and  
639 subsequent digestion (Bartos et al., 1999; Clemens et al., 1998). The VCs have been shown to  
640 regulate locomotion, potentially through the GABAergic motor neurons or via direct release of  
641 ACh that drives excitation and contraction of the body wall muscles to slow locomotion (**Figure**  
642 **8**; Collins et al., 2016). Slowing of locomotion during egg laying may provide time for the vulval  
643 muscles to fully contract (Collins et al., 2016; Collins & Koelle, 2013). This slowing could function  
644 to hold the animal in a body posture that is favorable for vulval opening and egg release, which  
645 would be consistent with our finding that VC activity causes elongated vulval muscle Ca<sup>2+</sup> twitch

646 transients (Figure 3). In this role, the VCs would be signaling to the rest of the egg-laying circuit  
647 and locomotion circuit that the vulva is open so that body posture can be held in a favorable  
648 phase for egg release. The six VCs also make synapses onto each another (Cook et al., 2019).  
649 The mechanical activation of the vulva-proximal VCs during vulval opening may excite the distal  
650 VC neurons to slow locomotion and control body posture for efficient egg release. Failed egg-  
651 laying events could occur because of disrupted phasing of the locomotion pattern with activity in  
652 the egg-laying circuit. Since twitches and egg-laying events occur at a specific phase of the  
653 locomotion pattern (Collins & Koelle, 2013), the opening of the vulva and egg release may  
654 require not only coordinated muscle contraction, but also the relaxation of immediately proximal  
655 body wall muscles so that they cannot physically resist the full opening of the vulva. Thus, the  
656 VCs may act to coordinate the excitation of the vm2 muscles with excitatory input from the VA/VB  
657 locomotion motor neurons onto the vm1 muscles to facilitate full contraction and egg laying in  
658 phase with locomotion.

659 In all, the VC neurons and the egg-laying circuit present a tractable model system for  
660 investigating how different forms of chemical signaling and mechanosensory feedback work  
661 together to drive a robust behavior. The elucidation of the cellular and molecular mechanisms  
662 underlying these distinct forms of feedback could help the understanding of human neurological  
663 diseases where muscle coordination and proprioception are dysregulated, such as in  
664 Parkinson's and Huntington disease (Bargmann, 2012; Lukos et al., 2013).

665

666 **Movie 1. GCaMP5/mCherry ratio recording of VC Ca<sup>2+</sup> activity during the egg-laying active**  
667 **state.**

668 Ratio of GCaMP5 and mCherry fluorescence in the VC neurons mapped onto a false color  
669 spectrum ranging from blue (low Ca<sup>2+</sup>) to red (high Ca<sup>2+</sup>). The VC neurons show high Ca<sup>2+</sup>  
670 activity and physical displacement as the vulval muscles contract and an egg passes through  
671 the vulva to be laid. The Ca<sup>2+</sup> activity then returns to a low level until a vulval muscle twitch  
672 occurs (0:09) followed by another egg-laying event.

673

674 **Movie 2. GCaMP5/mCherry ratio recording of vulval muscle Ca<sup>2+</sup> in response to**  
675 **optogenetic stimulation of the VCs.**

676 Ratio of GCaMP5 and mCherry fluorescence in the vulval muscles mapped onto a false color  
677 spectrum ranging from blue (low Ca<sup>2+</sup>) to red (high Ca<sup>2+</sup>). Optogenetic activation of the VC  
678 neurons induces vulval muscle Ca<sup>2+</sup> activity and twitches, but not egg laying.

679

680 **Movie 3. GCaMP5/mCherry ratio recording of vulval muscle Ca<sup>2+</sup> during the egg-laying**  
681 **active state when synaptic transmission from the VC neurons is blocked by TeTx.**

682 Ratio of GCaMP5 and mCherry fluorescence in the vulval muscles mapped onto a false color  
683 spectrum ranging from blue (low Ca<sup>2+</sup>) to red (high Ca<sup>2+</sup>). The vulval muscles still exhibit twitches  
684 and egg-laying events but will also frequently fail to lay eggs in response to high Ca<sup>2+</sup> activity,  
685 termed “failed egg-laying events”.

686

687 **Movie 4. Brightfield recording of vulval opening and egg laying in response to**  
688 **optogenetic stimulation of the vulval muscles.**

689 Brightfield recording of egg laying in response to optogenetic vulval muscle activation.  
690 Optogenetic activation of the vulval muscles induces tetanic vulval muscle contraction, but vulval  
691 opening and egg release remains phased with the body bends of locomotion.

692

693 **Movie 5. GCaMP5/mCherry ratio recording of VC Ca<sup>2+</sup> in response to optogenetic**  
694 **stimulation of the vulval muscles.**

695 Ratio of GCaMP5 and mCherry fluorescence in the VCs mapped onto a false color spectrum  
696 ranging from blue (low) to red (high). Optogenetic activation of the vulval muscles causes an  
697 immediate induction of VC Ca<sup>2+</sup> activity that remains at a high level for the duration of the  
698 stimulation.

699

700

## 701 **Materials & Methods**

### 702 **Nematode culture and strains**

703 All *C. elegans* strains were maintained at 20 °C on Nematode Growth Medium (NGM) agar  
704 plates seeded with OP50 *E. coli* as described (Brenner, 1974). All assays were conducted on  
705 age-matched adult hermaphrodites at 24-30 h past the late L4 stage, unless otherwise stated.  
706 A list of all strains generated and used in this study can be found in Table 1.

707

### 708 **Plasmid and strain construction**

709 Oligonucleotides were synthesized by IDT-DNA. PCR was performed using high-fidelity Phusion  
710 DNA polymerase (New England Biolabs) except for routine genotyping which was performed  
711 using standard Taq DNA polymerase. Plasmids were prepared using a Qiagen miniprep spin kit.  
712 DNA concentrations were determined using a Nano-Drop spectrophotometer.

713

714 *Tetanus toxin (TeTx)-expressing transgenes:*

715 VC neuron TeTx –<sub>A</sub> ~1.4 kB DNA fragment encoding TeTx was cut from pAJ49 (Jose et al.,  
716 2007) with AgeI/XhoI, and ligated into a similarly digested pKMC145 [*lin-11::GFP::unc-54 3'*  
717 *UTR*] to generate pKMC282 [*lin-11::TeTx::unc-54 3' UTR*]. pKMC282 (50 ng/μl) was injected  
718 along with pL15EK (50 ng/μl; (Clark et al., 1994)) into LX1832 *lite-1(ce314) lin-15(n765ts) X*  
719 generating four independent transgenic lines of which one, MIA113 *keyEx32 [lin-11::TeTx::unc-*  
720 *54 3'UTR + lin-15(+)]*; *lite-1(ce314) lin-15(n765ts) X*, was used for integration. *keyEx32* was  
721 integrated with UV/TMP generating three independent integrants *keyIs32-33* and *keyIs46 [lin-*  
722 *11::TeTx::unc-54 3'UTR + lin-15(+)]*. Each transgenic line was backcrossed six times to LX1832  
723 generating strains MIA144-146. All transgenic strains appeared phenotypically similar, and

724 MIA144 and MIA146 were used for experiments and further crosses. To eliminate HSNs in  
725 animals lacking VC synaptic transmission, MIA26 *egl-1(n986dm) V* mutant animals were  
726 crossed with MIA146 to generate MIA173 *keyIs46; egl-1(n986dm) V; lite-1(ce314) lin-15(n765ts)*  
727 *X*.

728

729 *Histamine-gated chloride channel (HisCl)-expressing transgenes:*

730 VC neuron HisCl – The ~1.3 kB DNA fragment encoding *Drosophila* histamine-gated chloride  
731 channel HisCl1 was PCR amplified from pNP403 (Pokala et al., 2014) using the oligonucleotides  
732 5'-GCG CCC GGG GTA GAA AAA ATG CAA AGC CCA ACT AGC AAA TTG G-3' and 5'-GCG  
733 GAG CTC TTA TCA TAG GAA CGT TGT CCA ATA GAC AAT A-3', cut with XmaI/SacI, and  
734 ligated into AgeI/SacI-digested pKMC145 to generate pAB2 [*lin-11::HisCl::unc-54 3'UTR*]. pAB2  
735 (20 ng/μl) was injected into LX1832 along with pL15EK (50 ng/μl), generating the  
736 extrachromosomal line MIA93 *keyEx24 [lin-11::HisCl::unc-54 3'UTR + lin-15(+)]*; *lite-1(ce314)*  
737 *lin-15(n765ts) X*. The extrachromosomal transgene subsequently integrated using UV/TMP to  
738 generate the transgenes *keyIs23-30 [lin-11::HisCl::unc-54 3'UTR + lin-15(+)]*. Strains bearing  
739 these transgenes were then backcrossed to the LX1832 parent strain six times, generating  
740 strains MIA124, MIA125, MIA130, MIA131, and MIA132. All transgenic strains appeared  
741 phenotypically similar, and MIA125 was used for experiments and further crosses. To eliminate  
742 the HSN neurons in animals expressing HisCl in the VC neurons, MIA125 *keyIs23; lite-1(ce314)*  
743 *lin-15(n765ts) X* was crossed with MIA26 to generate MIA176 *keyIs23; egl-1(n986dm); lite-*  
744 *1(ce314) lin-15(n765ts) X*.

745

746 *Channelrhodopsin-2 (ChR2)-expressing transgenes:*

747 Vulval muscle ChR2 – To express ChR2 in the vulval muscles, the ~1 kB DNA fragment  
748 encoding for ChR2 was PCR amplified from pRK7 [*del-1::ChR2(H34R/T159C)::unc-54 3' UTR*]  
749 using oligonucleotides 5'-GCG GCT AGC ATG GAT TAT GGA GGC GCC CTG-3' and 5'-GCG  
750 GGT ACC TCA GGT GGC CGC GGG GAC CGC GCC AGC CTC GGC C-3'. The amplicon and  
751 recipient plasmid, pBR3 (Ravi et al., 2018a), were digested with NheI/KpnI, generating pRK11  
752 [*ceh-24::ChR2(H34R/T159C)::unc-54 3' UTR*]. pRK11 (50 ng/μl) was injected into LX1832 along  
753 with pL15EK (50 ng/μl) generating MIA212 *keyEx43* [*ceh-24::ChR2(H34R/T159C)::unc-54*  
754 *3'UTR + lin-15(+)*] which was subsequently integrated with UV/TMP, generating five independent  
755 integrated transgenes *keyIs47-51*. Strains carrying these integrated transgenes were then  
756 backcrossed to the LX1832 parent strain six times, generating the strains MIA229-232 and  
757 MIA242. All transgenic strains were phenotypically similar, and MIA229 was used for  
758 experiments and further crosses.

759 VC ChR2 – The allele *keyIs3* was used to express ChR2 in the VC neurons under a modified  
760 *lin-11* promoter, as previously described (Collins et al., 2016).

761 HSN ChR2 – The allele *wzIs30* was used to express ChR2 in the HSN neurons under the *egl-6*  
762 promoter, as previously described (Collins et al., 2016; Emtage et al., 2012).

763

764 *Calcium reporter transgenes:*

765 Vulval muscle GCaMP5 – Vulval muscle Ca<sup>2+</sup> activity was visualized using the strain LX1918  
766 which co-expresses GCaMP5 and mCherry in the vulval muscles from the *unc-103e* promoter  
767 (Collins et al., 2016). To analyze vulval muscle Ca<sup>2+</sup> activity in animals where VC synaptic  
768 transmission was blocked with TeTx, LX1918 was crossed with MIA144 to generate MIA183  
769 *keyIs33; vsIs164 lite-1(ce314) lin-15(n765ts) X*. To analyze vulval muscle Ca<sup>2+</sup> activity in animals

770 where the VC neurons could be optogenetically activated by ChR2, LX1918 was crossed with  
771 MIA3 (Collins et al., 2016), to generate MIA221 *keyIs3; vsIs164 lite-1(ce314) lin-15(n765ts) X*.  
772 To analyze vulval muscle Ca<sup>2+</sup> activity in animals where the vulval muscles could be  
773 optogenetically activated by ChR2, LX1918 was crossed with MIA229 to generate MIA250  
774 *keyIs49; vsIs164 lite-1(ce314) lin-15(n765ts) X*.

775 VC neuron GCaMP5 – VC neuron Ca<sup>2+</sup> activity was visualized using the strain LX1960 which  
776 co-expresses GCaMP5 and mCherry in the VC neurons (Collins et al., 2016). To visualize VC  
777 activity during optogenetic stimulation of the HSNs, the strain LX1970 was used (Collins et al.,  
778 2016). To visualize VC activity after optogenetic stimulation of the vulval muscles, LX1960 was  
779 crossed with MIA229 to generate MIA241 *vsIs172; keyIs48 lite-1(ce314) lin-15(n765ts) X*. To  
780 visualize VC activity after optogenetic stimulation of the vulval muscles when muscle contraction  
781 is impaired, CB190 *unc-54(e190) I* myosin heavy chain null mutants were crossed with LX1832  
782 to generate MIA274 *unc-54(e190) I; lite-1(ce314) lin-15(n765ts) X*. MIA274 was then crossed  
783 with MIA241 to generate MIA298 *keyIs48; vsIs172; unc-54(e190) I; lite-1(ce314) lin-15(n765ts)*  
784 *X*.

785 HSN neuron GCaMP5 – HSN neuron Ca<sup>2+</sup> activity was visualized using the strain LX2004 which  
786 co-expresses GCaMP5 and mCherry in the HSN neurons (Collins et al., 2016). To visualize HSN  
787 Ca<sup>2+</sup> after neurotransmission from the VC neurons is blocked by TeTx, LX2004 was crossed  
788 with MIA144 to generate MIA217 *keyIs33; vsIs183 lite-1(ce314) lin-15(n765ts) X*.

789

## 790 **Ratiometric Ca<sup>2+</sup> imaging**

791 Ratiometric Ca<sup>2+</sup> imaging of the vulval muscles and VC neurons in freely behaving animals was  
792 performed as previously described methods (Ravi et al., 2018b). Late L4 hermaphrodites were



793 staged and then imaged 24 h later by being moved to an NGM agar chunk between two glass  
794 coverslips. Animals were recorded on a Zeiss Axio Observer.Z1 inverted compound microscope  
795 with a 20X 0.8NA Apochromat objective. Brightfield recordings of behavior was recorded with  
796 infrared illumination using a FLIR Grasshopper 3 CMOS camera after 2x2 binning using FlyCap  
797 software. Colibri.2 470 nm and 590 nm LEDs were used to co-excite GCaMP5 and mCherry  
798 fluorescence which was captured at 20 Hz onto a Hamamatsu ORCA Flash-4.0V2 sCMOS  
799 camera after channel separation using a Gemini image splitter. For Ca<sup>2+</sup> imaging of the vulval  
800 muscles, a lateral focal plane was used to capture the anterior and posterior vm1 and vm2 cells  
801 on one side of the animal. For Ca<sup>2+</sup> imaging of the VC neurons, a lateral focal plane was used  
802 to capture the VC4 and VC5 cell bodies and their presynaptic termini around the vulva. Each  
803 animal was recorded until it entered an active egg-laying phase (up to 1 h), after which a 10-  
804 minute segment centered around the onset of egg laying was extracted from the full recording  
805 for analysis. Two-channel fluorescence (GCaMP5/mCherry) image sequences were processed  
806 and analyzed in Fiji (Schindelin et al., 2012), Volocity (PerkinElmer), and a custom script for  
807 MATLAB (MathWorks) as previously described (Ravi et al., 2018b).

808 Ratiometric Ca<sup>2+</sup> imaging of the HSN neurons in freely behaving animals was performed as  
809 previously described (Ravi et al., 2018a). Late L4 hermaphrodites were staged and then imaged  
810 24 h later by being moved to an NGM agar chunk and a glass coverslip being placed over.  
811 Animals were recorded on an inverted Leica TCS SP5 confocal microscope with a 20X 0.7NA  
812 Apochromat objective. 488 nm and 561 nm laser lines were used to co-excite GCaMP5 and  
813 mCherry fluorescence, respectively.

814

815 **Electrical silencing using HisCI**

816 Acute electrical silencing with histamine was performed as previously described (Pokala et al.,  
817 2014; Ravi et al., 2018a). Animals were moved onto OP50-seeded NGM agar plates that  
818 contained either 0 mM or 10 mM histamine for four hours before the experiment.

819

## 820 **Egg-laying behavior assays**

821 The steady-state accumulation of eggs in the uterus was determined as previously described  
822 (Koelle & Horvitz, 1996). Briefly, late L4 hermaphrodites were staged onto OP50-seeded plates  
823 and grown at 20 °C for 30 h after which a single adult was placed into a 7 ul drop of 20% sodium  
824 hypochlorite (bleach) solution. The eggs, which are resistant to bleach, were then counted using  
825 a dissecting microscope. The timing of the first egg laid was assayed by staging a young adult  
826 (within 30 minutes of L4 to adult molt) animal onto an NGM agar plate with food and checking  
827 every following 30 minutes for the presence of an egg on the plate (Ravi et al., 2018a).

828 Egg laying in liquid in response to exogenous serotonin was performed as described (Banerjee  
829 et al., 2017; Trent et al., 1983). Late L4 hermaphrodites were staged onto OP50-seed plates  
830 and grown at 20 °C for 24 h. Adult animals were placed singly into either 100 ul M9 buffer only  
831 or M9 buffer containing 18.5 mM serotonin creatinine sulfate salt (Sigma-Aldrich) in a 96-well  
832 microtiter dish. The number of eggs laid by each animal after 1 hour were then counted. Egg  
833 laying on plates in response to exogenous serotonin was performed on NGM agar infused with  
834 18.5 mM serotonin creatine sulfate salt (Sigma-Aldrich). 3 animals were placed on each NGM  
835 agar plate and the number of eggs laid was counted after 1 hour and divided by 3 to calculate  
836 an average-animal response per plate.

837

## 838 **Optogenetics**

839 Optogenetic experiments with Channelrhodopsin-2 (ChR2) were performed using a Zeiss Axio  
840 Observer.Z1 inverted compound microscope as previously described (Collins et al., 2016). ChR2  
841 was excited in freely behaving animals using a 470 nm (blue) LED. Late L4 animals were staged  
842 onto NGM agar plates seeded with *E. coli* OP50 bacterial cultures containing either 0.4 mM all-  
843 *trans* retinal (ATR) or no ATR 24 h prior to the start of the experiment. Animals were then  
844 continuously illuminated with blue light for 3-5 minutes and the locomotion behavior and number  
845 of egg-laying events were recorded. For experiments combining optogenetics with ratiometric  
846  $Ca^{2+}$  imaging, the blue light would excite both the ChR2 and GCaMP5 fluorescence  
847 simultaneously. Blue light intensity was chosen based on both optimal settings to observe robust  
848 ChR2-activation and GCaMP5 fluorescence. Animals were excluded from a dataset if they  
849 entered an active egg-laying state before the onset of blue light stimulation (one animal in total  
850 across all experiments).

851

## 852 **Experimental design and statistical analyses**

853 Sample sizes for behavioral assays and  $Ca^{2+}$  imaging experiments followed previous studies  
854 (Banerjee et al., 2017; Collins et al., 2016; Ravi et al., 2018a). A minimum of 10 animals per  
855 genotype per condition were measured across all experiments. One animal was excluded from  
856 the analysis of VC Channelrhodopsin-2; vulval muscles GCaMP5 experiment because it entered  
857 an egg-laying active state before the onset of blue light stimulation. No other data or animals  
858 were excluded. No explicit power analysis was performed prior to the study. All data were  
859 analyzed using GraphPad Prism 8. Steady-state egg accumulation and timing of first egg laid  
860 assays were compared using a one-way ANOVA with Bonferroni's correction for multiple  
861 comparisons. Serotonin-induced egg laying assays were compared using either a Kruskal-Wallis  
862 test with Dunn's correction for multiple comparisons (in buffer with individual responses) or a

863 one-way ANOVA with Bonferroni's correction for multiple comparisons (on plates with averaged  
864 responses). Inter-transient intervals of  $\text{Ca}^{2+}$  transients compared between active and inactive  
865 egg-laying behavior states were pooled together across all animals and analyzed using either a  
866 Kolmogorov-Smirnov test or Kruskal-Wallis test with Dunn's correction for multiple comparisons.  
867 Per animal rates of failed egg-laying events were analyzed using a Mann-Whitney test.  $\text{Ca}^{2+}$   
868 transient peak amplitude, inter-transient interval, or transient widths were first averaged across  
869 each animal and then these averages were compared across animals using either a Student's t  
870 test or a one-way ANOVA with Bonferroni's correction for multiple comparisons. The number of  
871 animals and instances of analyzed behavior events along with exact p values resulting from  
872 defined statistical tests are reported within each figure legend.

873

874

875 **Table 1. Strain names and genotypes for all animals used in this study.**

| Strain | Genotype                                                        | Feature                                                                                                | Reference                |
|--------|-----------------------------------------------------------------|--------------------------------------------------------------------------------------------------------|--------------------------|
| N2     | <i>wild type</i>                                                | Bristol wild-type strain                                                                               | (Brenner, 1974)          |
| CB190  | <i>unc-54(e190) I</i>                                           | Myosin heavy chain null mutant                                                                         | (Brenner, 1974)          |
| LX1832 | <i>lite-1(ce314) X lin-15(n765ts) X</i>                         | Blue light-resistant (optogenetics and Ca <sup>2+</sup> imaging), multivulva (injection rescue marker) | (Collins & Koelle, 2013) |
| LX1918 | <i>vsIs164 lite-1(ce314) lin-15(n765ts) X</i>                   | Vulval muscles expressing GCaMP5, mCherry                                                              | (Collins et al., 2016)   |
| LX1960 | <i>vsIs172; lite-1(ce314) lin-15(n765ts) X</i>                  | VC GCaMP5, mCherry                                                                                     | (Collins et al., 2016)   |
| LX1970 | <i>wzIs30 IV; vsIs172; lite-1(ce314) lin-15(n765ts) X</i>       | HSN Channelrhodopsin-2; VC GCaMP5, mCherry                                                             | (Collins et al., 2016)   |
| LX1978 | <i>nlp-3(tm3023) X</i>                                          | <i>nlp-3</i> null                                                                                      | (Brewer et al., 2019)    |
| LX2004 | <i>vsIs183 lite-1(ce314) lin-15(n765ts) X</i>                   | HSN expressing GCaMP5, mCherry                                                                         | (Collins et al., 2016)   |
| MIA26  | <i>egl-1(n986dm) V</i>                                          | No HSNs                                                                                                | (Ravi et al., 2018a)     |
| MIA116 | <i>keyIs21; lite-1(ce314) lin-15(n765ts) X</i>                  | HSN HisCl                                                                                              | (Ravi et al., 2018a)     |
| MIA123 | <i>egl-1(n986dm) V lite-1(ce314) lin-15(n765ts) X</i>           | No HSNs                                                                                                | this study               |
| MIA125 | <i>keyIs23; lite-1(ce314) lin-15(n765ts) X</i>                  | VC HisCl                                                                                               | this study               |
| MIA144 | <i>keyIs33; lite-1(ce314) lin-15(n765ts) X</i>                  | VC TeTx                                                                                                | this study               |
| MIA146 | <i>keyIs46; lite-1(ce314) lin-15(n765ts) X</i>                  | VC TeTx                                                                                                | this study               |
| MIA173 | <i>keyIs46; egl-1(n986dm) V lite-1(ce314) lin-15(n765ts) X</i>  | VC TeTx; no HSNs                                                                                       | this study               |
| MIA176 | <i>keyIs23; egl-1(n986dm) V; lite-1(ce314) lin-15(n765ts) X</i> | VC HisCl; no HSNs                                                                                      | this study               |

|        |                                                                         |                                                                                                               |            |
|--------|-------------------------------------------------------------------------|---------------------------------------------------------------------------------------------------------------|------------|
| MIA183 | <i>keyls33; vsIs164 lite-1(ce314) lin-15(n765ts) X</i>                  | VC TeTx; vulval muscle GCaMP5, mCherry                                                                        | this study |
| MIA217 | <i>keyl33; vsIs183 lite-1(ce314) lin-15(n765ts) X</i>                   | VC TeTx; HSN GCaMP5, mCherry                                                                                  | this study |
| MIA221 | <i>keyls3; vsIs164; lite-1(ce314) lin-15(n765ts) X</i>                  | VC Channelrhodopsin-2; vulval muscle GCaMP5, mCherry                                                          | this study |
| MIA229 | <i>keyls48; lite-1(ce314) lin-15(n765ts) X</i>                          | Vulval muscle Channelrhodopsin-2                                                                              | this study |
| MIA241 | <i>keyls48; vsIs172; lite-1(ce314) lin-15(n765ts) X</i>                 | Vulval muscle Channelrhodopsin-2; VC GCaMP5, mCherry                                                          | this study |
| MIA250 | <i>keyls48; vsIs164 lite-1(ce314) lin-15(n765ts) X</i>                  | Vulval muscle Channelrhodopsin-2, GCaMP5, mCherry                                                             | this study |
| MIA298 | <i>keyls48; vsIs172; unc-54(e190) I; lite-1(ce314) lin-15(n765ts) X</i> | Vulval muscle Channelrhodopsin-2; VC GCaMP5, mCherry; <i>unc-54</i> myosin heavy chain null mutant background | this study |
| MIA428 | <i>nlp-3(tm3023); keyls33</i>                                           | VC TeTx; <i>nlp-3</i> null                                                                                    | this study |

877 **References**

- 878 Altun, Z. F., Chen, B., Wang, Z.-W., & Hall, D. H. (2009). High resolution map of *Caenorhabditis*  
879 *elegans* gap junction proteins. *Developmental Dynamics*, 238(8), 1936–1950.  
880 <https://doi.org/10.1002/dvdy.22025>
- 881 Bacqué-Cazenave, J., Bharatiya, R., Barrière, G., Delbecque, J.-P., Bouguiyou, N., Di  
882 Giovanni, G., Cattaert, D., & De Deurwaerdère, P. (2020). Serotonin in Animal Cognition  
883 and Behavior. *International Journal of Molecular Sciences*, 21(5).  
884 <https://doi.org/10.3390/ijms21051649>
- 885 Banerjee, N., Bhattacharya, R., Gorczyca, M., Collins, K. M., & Francis, M. M. (2017). Local  
886 neuropeptide signaling modulates serotonergic transmission to shape the temporal  
887 organization of *C. elegans* egg-laying behavior. *PLOS Genetics*, 13(4), e1006697.  
888 <https://doi.org/10.1371/journal.pgen.1006697>
- 889 Bany, I. A., Dong, M.-Q., & Koelle, M. R. (2003). Genetic and Cellular Basis for Acetylcholine  
890 Inhibition of *Caenorhabditis elegans* Egg-Laying Behavior. *Journal of Neuroscience*,  
891 23(22), 8060–8069. <https://doi.org/10.1523/JNEUROSCI.23-22-08060.2003>
- 892 Bardoni, R. (2019). Serotonergic Modulation of Nociceptive Circuits in Spinal Cord Dorsal Horn.  
893 *Current Neuropharmacology*, 17(12), 1133–1145.  
894 <https://doi.org/10.2174/1570159X17666191001123900>
- 895 Bargmann, C. I. (2012). Beyond the connectome: How neuromodulators shape neural circuits.  
896 *BioEssays: News and Reviews in Molecular, Cellular and Developmental Biology*, 34(6),  
897 458–465. <https://doi.org/10.1002/bies.201100185>
- 898 Bargmann, C. I., & Marder, E. (2013). From the connectome to brain function. *Nature Methods*,  
899 10(6), 483–490. <https://doi.org/10.1038/nmeth.2451>

- 900 Bartos, M., Manor, Y., Nadim, F., Marder, E., & Nusbaum, M. P. (1999). Coordination of Fast  
901 and Slow Rhythmic Neuronal Circuits. *Journal of Neuroscience*, *19*(15), 6650–6660.  
902 <https://doi.org/10.1523/JNEUROSCI.19-15-06650.1999>
- 903 Bartussek, J., & Lehmann, F.-O. (2016). Proprioceptive feedback determines visuomotor gain in  
904 *Drosophila*. *Royal Society Open Science*, *3*(1). <https://doi.org/10.1098/rsos.150562>
- 905 Batista-García-Ramó, K., & Fernández-Verdecia, C. I. (2018). What We Know About the Brain  
906 Structure-Function Relationship. *Behavioral Sciences (Basel, Switzerland)*, *8*(4).  
907 <https://doi.org/10.3390/bs8040039>
- 908 Bentley, B., Branicky, R., Barnes, C. L., Chew, Y. L., Yemini, E., Bullmore, E. T., Vértes, P. E.,  
909 & Schafer, W. R. (2016). The Multilayer Connectome of *Caenorhabditis elegans*. *PLoS*  
910 *Computational Biology*, *12*(12), e1005283. <https://doi.org/10.1371/journal.pcbi.1005283>
- 911 Brenner, S. (1974). The Genetics of CAENORHABDITIS ELEGANS. *Genetics*, *77*(1), 71–94.
- 912 Brewer, J. C., Olson, A. C., Collins, K. M., & Koelle, M. R. (2019). Serotonin and neuropeptides  
913 are both released by the HSN command neuron to initiate *Caenorhabditis elegans* egg  
914 laying. *PLOS Genetics*, *15*(1), e1007896. <https://doi.org/10.1371/journal.pgen.1007896>
- 915 Chase, D. L., Pepper, J. S., & Koelle, M. R. (2004). Mechanism of extrasynaptic dopamine  
916 signaling in *Caenorhabditis elegans*. *Nature Neuroscience*, *7*(10), 1096–1103.  
917 <https://doi.org/10.1038/nn1316>
- 918 Clark, S. G., Lu, X., & Horvitz, H. R. (1994). The *Caenorhabditis elegans* locus *lin-15*, a negative  
919 regulator of a tyrosine kinase signaling pathway, encodes two different proteins. *Genetics*,  
920 *137*(4), 987–997.
- 921 Clemens, S., Combes, D., Meyrand, P., & Simmers, J. (1998). Long-term expression of two  
922 interacting motor pattern-generating networks in the stomatogastric system of freely  
923 behaving lobster. *Journal of Neurophysiology*, *79*(3), 1396–1408.  
924 <https://doi.org/10.1152/jn.1998.79.3.1396>



- 925 Collins, K. M., Bode, A., Fernandez, R. W., Tanis, J. E., Brewer, J. C., Creamer, M. S., & Koelle,  
926 M. R. (2016). Activity of the *C. elegans* egg-laying behavior circuit is controlled by  
927 competing activation and feedback inhibition. *ELife*, 5, e21126.  
928 <https://doi.org/10.7554/eLife.21126>
- 929 Collins, K. M., & Koelle, M. R. (2013). Postsynaptic ERG potassium channels limit muscle  
930 excitability to allow distinct egg-laying behavior states in *Caenorhabditis elegans*. *The*  
931 *Journal of Neuroscience: The Official Journal of the Society for Neuroscience*, 33(2), 761–  
932 775. <https://doi.org/10.1523/JNEUROSCI.3896-12.2013>
- 933 Cook, S. J., Jarrell, T. A., Brittin, C. A., Wang, Y., Bloniarz, A. E., Yakovlev, M. A., Nguyen, K.  
934 C. Q., Tang, L. T.-H., Bayer, E. A., Duerr, J. S., Bülow, H. E., Hobert, O., Hall, D. H., &  
935 Emmons, S. W. (2019). Whole-animal connectomes of both *Caenorhabditis elegans*  
936 sexes. *Nature*, 571(7763), 63–71. <https://doi.org/10.1038/s41586-019-1352-7>
- 937 Del-Bel, E., & De-Miguel, F. F. (2018). Extrasynaptic Neurotransmission Mediated by Exocytosis  
938 and Diffusive Release of Transmitter Substances. *Frontiers in Synaptic Neuroscience*,  
939 10. <https://doi.org/10.3389/fnsyn.2018.00013>
- 940 Desai, C., Garriga, G., McIntire, S. L., & Horvitz, H. R. (1988). A genetic pathway for the  
941 development of the *Caenorhabditis elegans* HSN motor neurons. *Nature*, 336(6200),  
942 638–646. <https://doi.org/10.1038/336638a0>
- 943 Dittman, J. S., & Kaplan, J. M. (2008). Behavioral impact of neurotransmitter-activated G-protein-  
944 coupled receptors: Muscarinic and GABAB receptors regulate *Caenorhabditis elegans*  
945 locomotion. *The Journal of Neuroscience: The Official Journal of the Society for*  
946 *Neuroscience*, 28(28), 7104–7112. <https://doi.org/10.1523/JNEUROSCI.0378-08.2008>
- 947 Donnelly, J. L., Clark, C. M., Leifer, A. M., Pirri, J. K., Haburcak, M., Francis, M. M., Samuel, A.  
948 D. T., & Alkema, M. J. (2013). Monoaminergic Orchestration of Motor Programs in a

- 949 Complex *C. elegans* Behavior. *PLOS Biology*, 11(4), e1001529.  
950 <https://doi.org/10.1371/journal.pbio.1001529>
- 951 Duerr, J. S., Gaskin, J., & Rand, J. B. (2001). Identified neurons in *C. elegans* coexpress  
952 vesicular transporters for acetylcholine and monoamines. *American Journal of*  
953 *Physiology. Cell Physiology*, 280(6), C1616-1622.  
954 <https://doi.org/10.1152/ajpcell.2001.280.6.C1616>
- 955 Duerr, J. S., Han, H.-P., Fields, S. D., & Rand, J. B. (2008). Identification of major classes of  
956 cholinergic neurons in the nematode *Caenorhabditis elegans*. *Journal of Comparative*  
957 *Neurology*, 506(3), 398–408. <https://doi.org/10.1002/cne.21551>
- 958 Emtage, L., Aziz-Zaman, S., Padovan-Merhar, O., Horvitz, H. R., Fang-Yen, C., & Ringstad, N.  
959 (2012). IRK-1 Potassium Channels Mediate Peptidergic Inhibition of *Caenorhabditis*  
960 *elegans* Serotonin Neurons via a Go Signaling Pathway. *Journal of Neuroscience*, 32(46),  
961 16285–16295. <https://doi.org/10.1523/JNEUROSCI.2667-12.2012>
- 962 Fang, Y., Nakashima, R., Matsumiya, K., Kuriki, I., & Shioiri, S. (2015). Eye-Head Coordination  
963 for Visual Cognitive Processing. *PLoS ONE*, 10(3).  
964 <https://doi.org/10.1371/journal.pone.0121035>
- 965 Fernandez, R. W., Wei, K., Wang, E. Y., Mikalauskaite, D., Olson, A., Pepper, J., Christie, N.,  
966 Kim, S., & Koelle, M. R. (2020). Cellular expression and functional roles of all 26  
967 neurotransmitter GPCRs in the *C. elegans* egg-laying circuit. *BioRxiv*,  
968 2020.04.23.037242. <https://doi.org/10.1101/2020.04.23.037242>
- 969 García-Crescioni, K., Fort, T. J., Stern, E., Brezina, V., & Miller, M. W. (2010). Feedback from  
970 peripheral musculature to central pattern generator in the neurogenic heart of the crab  
971 *Callinectes sapidus*: Role of mechanosensitive dendrites. *Journal of Neurophysiology*,  
972 103(1), 83–96. <https://doi.org/10.1152/jn.00561.2009>

- 973 Godínez-Chaparro, B., Barragán-Iglesias, P., Castañeda-Corral, G., Rocha-González, H. I., &  
974 Granados-Soto, V. (2011). Role of peripheral 5-HT(4), 5-HT(6), and 5-HT(7) receptors in  
975 development and maintenance of secondary mechanical allodynia and hyperalgesia.  
976 *Pain*, 152(3), 687–697. <https://doi.org/10.1016/j.pain.2010.12.020>
- 977 Hapiak, V. M., Hobson, R. J., Hughes, L., Smith, K., Harris, G., Condon, C., Komuniecki, P., &  
978 Komuniecki, R. W. (2009). Dual Excitatory and Inhibitory Serotonergic Inputs Modulate  
979 Egg Laying in *Caenorhabditis elegans*. *Genetics*, 181(1), 153–163.  
980 <https://doi.org/10.1534/genetics.108.096891>
- 981 Hardaker, L. A., Singer, E., Kerr, R., Zhou, G., & Schafer, W. R. (2001). Serotonin modulates  
982 locomotory behavior and coordinates egg-laying and movement in *Caenorhabditis*  
983 *elegans*. *Journal of Neurobiology*, 49(4), 303–313. <https://doi.org/10.1002/neu.10014>
- 984 Hardingham, G. E., & Bading, H. (2010). Synaptic versus extrasynaptic NMDA receptor  
985 signalling: Implications for neurodegenerative disorders. *Nature Reviews Neuroscience*,  
986 11(10), 682–696. <https://doi.org/10.1038/nrn2911>
- 987 Hobson, R. J., Hapiak, V. M., Xiao, H., Buehrer, K. L., Komuniecki, P. R., & Komuniecki, R. W.  
988 (2006). SER-7, a *Caenorhabditis elegans* 5-HT7-like Receptor, Is Essential for the 5-HT  
989 Stimulation of Pharyngeal Pumping and Egg Laying. *Genetics*, 172(1), 159–169.  
990 <https://doi.org/10.1534/genetics.105.044495>
- 991 Jose, A. M., Bany, I. A., Chase, D. L., & Koelle, M. R. (2007). A Specific Subset of Transient  
992 Receptor Potential Vanilloid-Type Channel Subunits in *Caenorhabditis elegans*  
993 Endocrine Cells Function as Mixed Heteromers to Promote Neurotransmitter Release.  
994 *Genetics*, 175(1), 93–105. <https://doi.org/10.1534/genetics.106.065516>
- 995 Kim, J., Poole, D. S., Waggoner, L. E., Kempf, A., Ramirez, D. S., Treschow, P. A., & Schafer,  
996 W. R. (2001). Genes affecting the activity of nicotinic receptors involved in *Caenorhabditis*  
997 *elegans* egg-laying behavior. *Genetics*, 157(4), 1599–1610.

- 998 Koelle, M. R. (2018). Neurotransmitter signaling through heterotrimeric G proteins: Insights from  
999 studies in *C. elegans*. *WormBook: The Online Review of C. Elegans Biology*.  
1000 <https://doi.org/10.1895/wormbook.1.75.2>
- 1001 Koelle, M. R., & Horvitz, H. R. (1996). EGL-10 regulates G protein signaling in the *C. elegans*  
1002 nervous system and shares a conserved domain with many mammalian proteins. *Cell*,  
1003 *84*(1), 115–125. [https://doi.org/10.1016/s0092-8674\(00\)80998-8](https://doi.org/10.1016/s0092-8674(00)80998-8)
- 1004 Lerner, T. N., Ye, L., & Deisseroth, K. (2016). Communication in Neural Circuits: Tools,  
1005 Opportunities, and Challenges. *Cell*, *164*(6), 1136–1150.  
1006 <https://doi.org/10.1016/j.cell.2016.02.027>
- 1007 Li, P., Collins, K. M., Koelle, M. R., & Shen, K. (2013). LIN-12/Notch signaling instructs  
1008 postsynaptic muscle arm development by regulating UNC-40/DCC and MADD-2 in  
1009 *Caenorhabditis elegans*. *ELife*, *2*. <https://doi.org/10.7554/eLife.00378>
- 1010 Lin, S.-Y., Chang, W.-J., Lin, C.-S., Huang, C.-Y., Wang, H.-F., & Sun, W.-H. (2011). Serotonin  
1011 Receptor 5-HT<sub>2B</sub> Mediates Serotonin-Induced Mechanical Hyperalgesia. *The Journal of*  
1012 *Neuroscience*, *31*(4), 1410–1418. <https://doi.org/10.1523/JNEUROSCI.4682-10.2011>
- 1013 Liu, P., Chen, B., & Wang, Z.-W. (2013). Postsynaptic current bursts instruct action potential  
1014 firing at a graded synapse. *Nature Communications*, *4*(1), 1911.  
1015 <https://doi.org/10.1038/ncomms2925>
- 1016 Liu, Q., Hollopeter, G., & Jorgensen, E. M. (2009). Graded synaptic transmission at the  
1017 *Caenorhabditis elegans* neuromuscular junction. *Proceedings of the National Academy*  
1018 *of Sciences*, *106*(26), 10823–10828. <https://doi.org/10.1073/pnas.0903570106>
- 1019 Lukos, J. R., Snider, J., Hernandez, M. E., Tunik, E., Hillyard, S., & Poizner, H. (2013).  
1020 Parkinson's disease patients show impaired corrective grasp control and eye-hand  
1021 coupling when reaching to grasp virtual objects. *Neuroscience*, *254*, 205–221.  
1022 <https://doi.org/10.1016/j.neuroscience.2013.09.026>

- 1023 Meinertzhagen, I. A. (2018). Of what use is connectomics? A personal perspective on the  
1024 *Drosophila* connectome. *The Journal of Experimental Biology*, 221(Pt 10).  
1025 <https://doi.org/10.1242/jeb.164954>
- 1026 Nusbaum, M. P., Blitz, D. M., & Marder, E. (2017). Functional consequences of neuropeptide  
1027 and small-molecule co-transmission. *Nature Reviews Neuroscience*, 18(7), 389–403.  
1028 <https://doi.org/10.1038/nrn.2017.56>
- 1029 Pereira, L., Kratsios, P., Serrano-Saiz, E., Sheftel, H., Mayo, A. E., Hall, D. H., White, J. G.,  
1030 LeBoeuf, B., Garcia, L. R., Alon, U., & Hobert, O. (2015). A cellular and regulatory map  
1031 of the cholinergic nervous system of *C. elegans*. *ELife*, 4, e12432.  
1032 <https://doi.org/10.7554/eLife.12432>
- 1033 Pokala, N., Liu, Q., Gordus, A., & Bargmann, C. I. (2014). Inducible and titratable silencing of  
1034 *Caenorhabditis elegans* neurons in vivo with histamine-gated chloride channels.  
1035 *Proceedings of the National Academy of Sciences*, 111(7), 2770–2775.  
1036 <https://doi.org/10.1073/pnas.1400615111>
- 1037 Ravi, B., Garcia, J., & Collins, K. M. (2018a). Homeostatic Feedback Modulates the  
1038 Development of Two-State Patterned Activity in a Model Serotonin Motor Circuit in  
1039 *Caenorhabditis elegans*. *Journal of Neuroscience*, 38(28), 6283–6298.  
1040 <https://doi.org/10.1523/JNEUROSCI.3658-17.2018>
- 1041 Ravi, B., Nassar, L. M., Kopchock, R. J., III, Dhakal, P., Scheetz, M., & Collins, K. M. (2018b).  
1042 Ratiometric Calcium Imaging of Individual Neurons in Behaving *Caenorhabditis Elegans*.  
1043 *JoVE (Journal of Visualized Experiments)*, 132, e56911. <https://doi.org/10.3791/56911>
- 1044 Richmond, J. E., & Jorgensen, E. M. (1999). One GABA and two acetylcholine receptors function  
1045 at the *C. elegans* neuromuscular junction. *Nature Neuroscience*, 2(9), 791–797.  
1046 <https://doi.org/10.1038/12160>

- 1047 Schafer, W. R. (2006). Genetics of Egg-Laying in Worms. *Annual Review of Genetics*, 40(1),  
1048 487–509. <https://doi.org/10.1146/annurev.genet.40.110405.090527>
- 1049 Schafer, W. R., Sanchez, B. M., & Kenyon, C. (1996). *Genes Affecting Sensitivity to Serotonin*  
1050 *in Caenorhabditis elegans*. 12.
- 1051 Schindelin, J., Arganda-Carreras, I., Frise, E., Kaynig, V., Longair, M., Pietzsch, T., Preibisch,  
1052 S., Rueden, C., Saalfeld, S., Schmid, B., Tinevez, J.-Y., White, D. J., Hartenstein, V.,  
1053 Eliceiri, K., Tomancak, P., & Cardona, A. (2012). Fiji: An open-source platform for  
1054 biological-image analysis. *Nature Methods*, 9(7), 676–682.  
1055 <https://doi.org/10.1038/nmeth.2019>
- 1056 Sengupta, P., & Samuel, A. D. T. (2009). C. elegans: A model system for systems neuroscience.  
1057 *Current Opinion in Neurobiology*, 19(6), 637–643.  
1058 <https://doi.org/10.1016/j.conb.2009.09.009>
- 1059 Shyn, S. I., Kerr, R., & Schafer, W. R. (2003). Serotonin and Go Modulate Functional States of  
1060 Neurons and Muscles Controlling C. elegans Egg-Laying Behavior. *Current Biology*,  
1061 13(21), 1910–1915. <https://doi.org/10.1016/j.cub.2003.10.025>
- 1062 Song, B., Faumont, S., Lockery, S., & Avery, L. (2013). Recognition of familiar food activates  
1063 feeding via an endocrine serotonin signal in *Caenorhabditis elegans*. *eLife*, 2.  
1064 <https://doi.org/10.7554/eLife.00329>
- 1065 Su, Y.-S., Chiu, Y.-Y., Lin, S.-Y., Chen, C.-C., & Sun, W.-H. (2016). Serotonin Receptor 2B  
1066 Mediates Mechanical Hyperalgesia by Regulating Transient Receptor Potential Vanilloid  
1067 1. *Journal of Molecular Neuroscience*, 59, 113–125. [https://doi.org/10.1007/s12031-015-](https://doi.org/10.1007/s12031-015-0693-4)  
1068 [0693-4](https://doi.org/10.1007/s12031-015-0693-4)
- 1069 Swanson, L. W., & Lichtman, J. W. (2016). From Cajal to Connectome and Beyond. *Annual*  
1070 *Review of Neuroscience*, 39(1), 197–216. [https://doi.org/10.1146/annurev-neuro-](https://doi.org/10.1146/annurev-neuro-071714-033954)  
1071 [071714-033954](https://doi.org/10.1146/annurev-neuro-071714-033954)

- 1072 Taylor, S. R., Santpere, G., Reilly, M., Glenwinkel, L., Poff, A., McWhirter, R., Xu, C., Weinreb,  
1073 A., Basavaraju, M., Cook, S. J., Barrett, A., Abrams, A., Vidal, B., Cros, C., Rafi, I., Sestan,  
1074 N., Hammarlund, M., Hobert, O., & Miller, D. M. (2019). Expression profiling of the mature  
1075 *C. elegans* nervous system by single-cell RNA-Sequencing. *BioRxiv*,  
1076 737577. <https://doi.org/10.1101/737577>
- 1077 Trent, C., Tsuing, N., & Horvitz, H. R. (1983). Egg-laying defective mutants of the nematode  
1078 *Caenorhabditis elegans*. *Genetics*, *104*(4), 619–647.
- 1079 Trojanowski, N. F., Raizen, D. M., & Fang-Yen, C. (2016). Pharyngeal pumping in  
1080 *Caenorhabditis elegans* depends on tonic and phasic signaling from the nervous system.  
1081 *Scientific Reports*, *6*(1), 22940. <https://doi.org/10.1038/srep22940>
- 1082 Waggoner, L. E., Dickinson, K. A., Poole, D. S., Tabuse, Y., Miwa, J., & Schafer, W. R. (2000).  
1083 Long-term nicotine adaptation in *Caenorhabditis elegans* involves PKC-dependent  
1084 changes in nicotinic receptor abundance. *The Journal of Neuroscience: The Official*  
1085 *Journal of the Society for Neuroscience*, *20*(23), 8802–8811.
- 1086 Waggoner, L. E., Zhou, G. T., Schafer, R. W., & Schafer, W. R. (1998). Control of Alternative  
1087 Behavioral States by Serotonin in *Caenorhabditis elegans*. *Neuron*, *21*(1), 203–214.  
1088 [https://doi.org/10.1016/S0896-6273\(00\)80527-9](https://doi.org/10.1016/S0896-6273(00)80527-9)
- 1089 Walker, D. S., & Schafer, W. R. (2020). Distinct roles for innexin gap junctions and hemichannels  
1090 in mechanosensation. *ELife*, *9*, e50597. <https://doi.org/10.7554/eLife.50597>
- 1091 Weiger, W. A. (1997). Serotonergic Modulation of Behaviour: A Phylogenetic Overview.  
1092 *Biological Reviews*, *72*(1), 61–95. <https://doi.org/10.1111/j.1469-185X.1997.tb00010.x>
- 1093 Whim, M. D., Niemann, H., & Kaczmarek, L. K. (1997). The Secretion of Classical and Peptide  
1094 Cotransmitters from a Single Presynaptic Neuron Involves a Synaptobrevin-Like  
1095 Molecule. *Journal of Neuroscience*, *17*(7), 2338–2347.  
1096 <https://doi.org/10.1523/JNEUROSCI.17-07-02338.1997>

- 1097 White, J. G., Southgate, E., Thomson, J. N., & Brenner, S. (1986). The structure of the nervous  
1098 system of the nematode *Caenorhabditis elegans*. *Philosophical Transactions of the Royal*  
1099 *Society of London. Series B, Biological Sciences*, 314(1165), 1–340.  
1100 <https://doi.org/10.1098/rstb.1986.0056>
- 1101 Xiao, H., Hapiak, V. M., Smith, K. A., Lin, L., Hobson, R. J., Plenefisch, J., & Komuniecki, R.  
1102 (2006). SER-1, a *Caenorhabditis elegans* 5-HT<sub>2</sub>-like receptor, and a multi-PDZ domain  
1103 containing protein (MPZ-1) interact in vulval muscle to facilitate serotonin-stimulated egg-  
1104 laying. *Developmental Biology*, 298(2), 379–391.  
1105 <https://doi.org/10.1016/j.ydbio.2006.06.044>
- 1106 Yeon, J., Kim, J., Kim, D.-Y., Kim, H., Kim, J., Du, E. J., Kang, K., Lim, H.-H., Moon, D., & Kim,  
1107 K. (2018). A sensory-motor neuron type mediates proprioceptive coordination of steering  
1108 in *C. elegans* via two TRPC channels. *PLOS Biology*, 16(6), e2004929.  
1109 <https://doi.org/10.1371/journal.pbio.2004929>
- 1110 Zhang, M., Chung, S. H., Fang-Yen, C., Craig, C., Kerr, R. A., Suzuki, H., Samuel, A. D. T.,  
1111 Mazur, E., & Schafer, W. R. (2008). A self-regulating feed-forward circuit controlling *C.*  
1112 *elegans* egg-laying behavior. *Current Biology: CB*, 18(19), 1445–1455.  
1113 <https://doi.org/10.1016/j.cub.2008.08.047>
- 1114 Zhang, M., Schafer, W. R., & Breitling, R. (2010). A circuit model of the temporal pattern  
1115 generator of *Caenorhabditis* egg-laying behavior. *BMC Systems Biology*, 4(1), 81.  
1116 <https://doi.org/10.1186/1752-0509-4-81>
- 1117 Zhen, M., & Samuel, A. D. (2015). *C. elegans* locomotion: Small circuits, complex functions.  
1118 *Current Opinion in Neurobiology*, 33, 117–126.  
1119 <https://doi.org/10.1016/j.conb.2015.03.009>
